## Calcium chloride enhances growth and physio-biochemical performance of barley (*Hordeum vulgare* L.) under drought-induced stress regimes: a future perspective of climate change in the region

Wadood Shah <sup>\*</sup>, Noor Zaman, Sami Ullah and Muhammad Nafees

Department of Botany, University of Peshawar, Peshawar 25120, Pakistan

\*Corresponding author. E-mail: wadood0301@gmail.com

 WS, 0000-0001-6058-6881

### ABSTRACT

Water is the fundamental part of living systems and it plays a key role in supporting life on earth; however, fluctuations in climatic conditions lead to limitation of the ground water causing serious concerns. The present research study was aimed at assessing growth and physio-biochemical responses of barley to calcium chloride ( $\text{CaCl}_2$ ) solution (10 mM) applied through roots under induced drought stress for 5, 10, and 15 days.  $\text{CaCl}_2$ , being an enhancer of osmolytes and antioxidant enzymes, counteracts the damaging effects caused by abiotic stresses. A pot experiment was conducted by sowing barley under induced drought stress for 5, 10, and 15 days, respectively. Plants exposed to different levels of the induced drought stress condition were treated with 10 mM of  $\text{CaCl}_2$  solution via roots during the seedling stage. Results indicated that water-limited conditions negatively affected plant growth parameters including final emergence percentage, final germination percentage, and mean emergence time. Moreover, absolute growth rate, relative growth rate, and net assimilation rate were significantly improved under 5, 10, and 15 days of drought stress supplemented with  $\text{CaCl}_2$  solution. Under drought conditions, an increase was observed in hydrogen peroxide ( $\text{H}_2\text{O}_2$ ), glycine betaine (GB), and proline (PRO) content, and in ascorbate peroxidase (APX), catalase (CAT), peroxidase (POD), superoxide dismutase (SOD), and lipid peroxide (LPO) activities.  $\text{H}_2\text{O}_2$  and LPO showed a significant decline with  $\text{CaCl}_2$  application under induced drought stress regimes. On the contrary, GB, PRO, APX, CAT, POD, and SOD contents of root and leaf were significantly improved with  $\text{CaCl}_2$  application under induced drought stress. In conclusion,  $\text{CaCl}_2$  solution effectively curbed the damages caused by oxidative stress via accumulating osmolytes and scavenging reactive oxygen species by activating the antioxidant enzymatic defence system of barley.

**Key words:** centrifugation, climate change, drought, Peshawar, spectrophotometry

### HIGHLIGHTS

- The agriculture sector of Pakistan has been negatively affected by changing climatic regimes.
- The groundwater table of Peshawar has been declining 1–3 feet/year for the last two decades.
- $\text{CaCl}_2$  application improved AGR, RGR, and NAR under drought stress conditions.
- $\text{H}_2\text{O}_2$  and LPO contents were reduced with  $\text{CaCl}_2$  application.
- Osmolytes content and antioxidant enzymes were improved with  $\text{CaCl}_2$  application under drought stress.

GRAPHICAL ABSTRACT

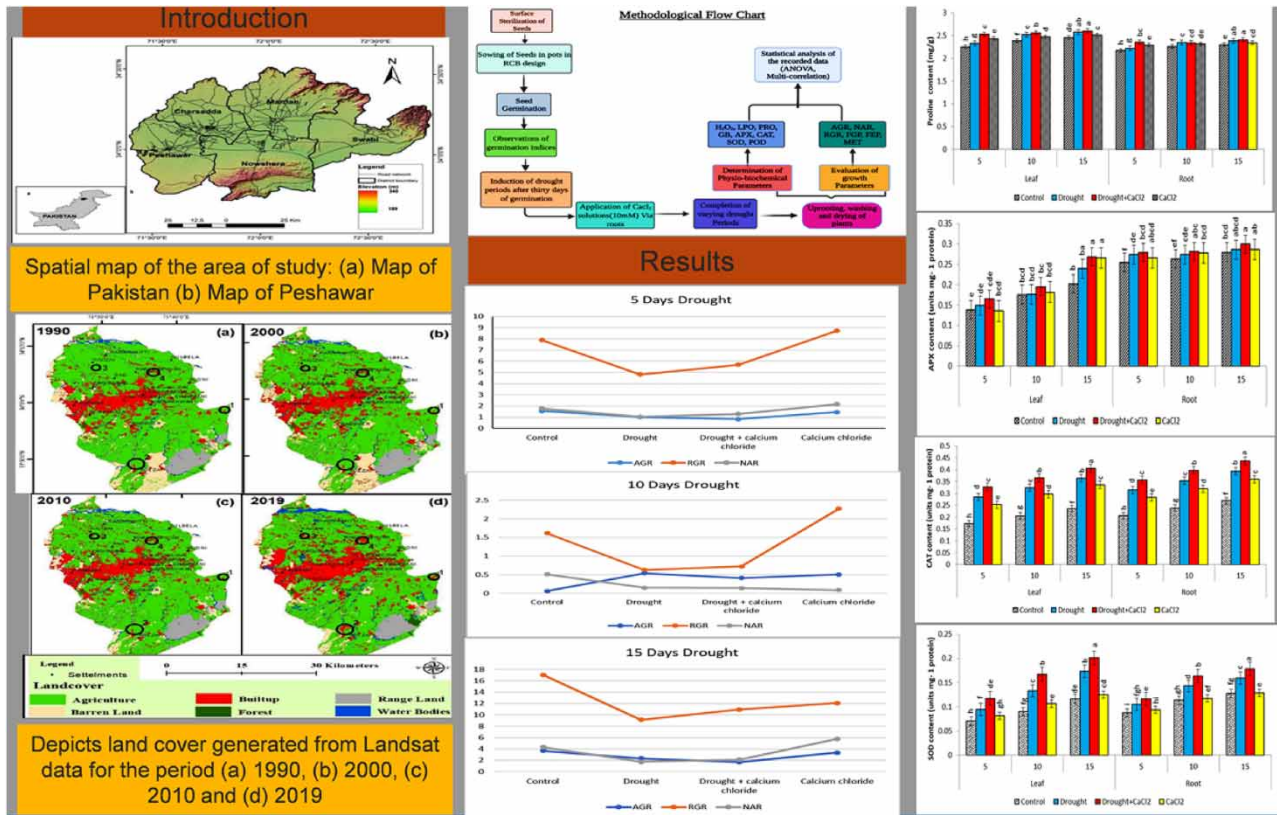

ABBREVIATIONS

- FEP final emergence percentage
- FGP final germination percentage
- MET mean emergence time
- AGR absolute growth rate
- RGR relative growth rate
- NAR net assimilation rate
- H<sub>2</sub>O<sub>2</sub> hydrogen peroxide
- GB glycine betaine
- PRO proline
- APX ascorbate peroxidase
- CAT catalase
- POD peroxidase
- SOD superoxide dismutase
- LPO lipid peroxide
- ROS reactive oxygen species
- CaCl<sub>2</sub> calcium chloride

1. INTRODUCTION

1.1. Physio-biochemical responses of plants to drought stress

Drought can be defined as ‘a prolonged shortage in the water supply, whether ground water, surface water, or atmospheric water’. Limited water availability is becoming a threatening issue all over the globe, and water stress conditions have intense negative effects on agriculture and ecosystems (Shao *et al.* 2008). It is believed that water scarcity is one of the most dangerous environmental stresses which drastically reduces plant growth and production up to 45% throughout the world in all the

cultivated lands (Mirzaee *et al.* 2013). Drought stress affects plant growth and development by declining the rate of photosynthesis. The major factor responsible for slowing the rate of photosynthesis is stomatal closure during abiotic stress regimes which ultimately leads to reduced stomatal CO<sub>2</sub> fixation (Rasouli *et al.* 2021). Plant growth, total biomass, and yield are affected by several environmental biotic factors such as microorganisms, anthropogenic activities, and abiotic factors like salinity, drought, temperature, toxicity of heavy metals, and oxidative stress (Jaleel *et al.* 2007a, 2007b). Plants confront water-deficit conditions mainly due to the following two factors: (a) when the rate of transpiration is very high or (b) it is difficult for the roots to absorb water from the soil. Both these conditions mostly coincide in arid and semiarid climates of the world (Jaleel *et al.* 2007a, 2007b). Turgidity of the cell is maintained by the formation of osmolytes, and osmotic potential being an adaptive mechanism in encountering the loss of turgor pressure under the drought stress is regulated by osmolytes accumulation in the cytoplasm (Manivannan *et al.* 2007).

Production of osmolytes such as protein, glycine betaine (GB), and proline (PRO) helps to combat the negative impacts of oxidative stress by providing suitable environmental conditions compatible with the structure and function of macromolecules (Dawood 2016). Owing to their non-toxicity, osmolytes have no effect on metabolic activities of plants due to their very low molecular weight and high solubility rate, which is why their presence even in a very large amount does not interfere with the normal cellular physio-biochemical processes (Slama *et al.* 2015). Previous studies showed that calcium is involved in the regulatory mechanisms, defence, and signalling that tend to adjust plants to droughts, cold, salt, and heavy metal stress (Xu *et al.* 2013). Plants facing abiotic stresses activate strong antioxidant enzymes such as superoxide dismutase (SOD), catalase (CAT), glutathione reductase (GR), ascorbate peroxidase (APX), peroxidase (POD), and non-enzymatically through vitamins and phenolics compounds (Al-Hassan *et al.* 2015).

Calcium (Ca<sup>++</sup>), being a macro-nutrient, plays a key part in plant growth regulation. It has a crucial role in controlling the structure and function of cell membranes. Calcium (Ca<sup>++</sup>) by binding to phospholipids upholds the structure of lipid bilayers thus providing structural integrity to plasma membranes. Besides, Ca<sup>++</sup> has been found to hamper the adverse impacts of oxidative stress via regulating plant water relations and antioxidant metabolism (Ahmad *et al.* 2015a, 2015b). Ca<sup>++</sup> is involved in regulating various cellular functions as a secondary messenger (Cousson 2009). As a secondary messenger, it helps in modulating important physiological functions such as nutrient uptake, and changes in cell status to assist the plant in counteracting the negative impacts of oxidative stress (Colorado *et al.* 1994). Adding Ca<sup>++</sup> supplements to irrigated water alleviates the adverse effects of water deficiency and decreases growth inhibition in plants. They also allow potassium ion transport and K<sup>+</sup>/Na<sup>+</sup> selectivity in Na<sup>+</sup>-stressed plants. Interaction of calcium and sodium ions on plant growth and ion relation is well recognized. Furthermore, it is well known that calcium ions increase the levels of osmolytes such as GB and PRO in abiotic stress conditions (Gobinathan *et al.* 2011).

Barley is an important cereal crop and is used as feed for animals in Pakistan. It is cultivated in temperate regions throughout the world at high altitudes as well as in plain areas. It belongs to the family Gramineae and is considered an important edible crop among communities of marginal areas, the highlands of central Asia, Horn of Africa, Andean countries, and the Baltic States. Barley is cultivated in environments ranging from the deserts of Middle East to high elevation of Himalayas (Hayat *et al.* 2012). It is the most important alternative food source in dry areas of the world (Barriga & Anj 2010; Khan & Bajwa 2010).

## 1.2. Future prospects of climate change in Peshawar (Pakistan)

Changing environmental conditions are becoming a hindrance to meeting the increasing demand for food and sustainable agriculture. Changes in climatic conditions lead to fluctuations in temperature, droughts, floods, earthquakes, and other environmental calamities, ultimately leading to shrinking crop productivity (Shah *et al.* 2021). In Pakistan, the duration of summer is longer than winter, and the temperature ranges between 30 and 45 °C in Peshawar as well as in other cities of Khyber Pakhtunkhwa. The temperature in Pakistan is expected to raise approximately 3 °C by 2040 and 5–6 °C by the end of this century (IUCN 2009). Pakistan has been impacted by the effects of environmental changes to a great extent and this enhanced susceptibility of the country to the danger of changing environment has broadly been recognized (Chaudhary 2017; Ghulam *et al.* 2017; Saeed & Athar 2018; Ali *et al.* 2020). Pakistan has witnessed 0.5 and 0.8 °C expansion in normal mean and extreme temperature, over the period 1961–2010 (Ali *et al.* 2020). While the future expansion in temperature is projected to be higher than the worldwide normal, the northern parts situated at a higher altitude are probably going to encounter significantly raised surface air temperature (5.8 °C) (Ali *et al.* 2015). Pakistan's population is quickly expanding with a growth rate of 2.1%, which is higher than the global growth rate of 1.1%. Considering the current situation of

environmental fluctuations, it is anticipated that 2.1 million hectares of arable land of Pakistan will be impacted by drought by 2025 (World Bank 2018). In general, during the summer and spring seasons Peshawar experiences drought periods due to a higher rate of transpiration and an increase in temperature (Farooq *et al.* 2009).

### 1.3. Impact of climate change on agriculture and hydrology

The majority of the South Asian countries including Pakistan have been recognized as drought susceptible zones exposed to the adverse consequences of climate change (Biemans *et al.* 2013). Exponential population growth rate, lack of water accessibility, soil degradation, and urbanization alongside environmental changes are the global challenges posing a threat to food security (Lal 2013). For the last decades, the agriculture sector of Pakistan has been adversely affected by changing climatic conditions, which might lead to food insecurity by 2030, bringing about a spike in food prices (Bandara & Cai 2014). Drought periods, floods, extreme temperatures and changes in precipitation patterns have a direct adverse impact on crop production. A research study carried out on wheat production of Swat, Charsadda, and Peshawar districts in Khyber Pakhtunkhwa, Pakistan, suggested that short-lived and high yielding varieties should be introduced in mountainous regions due to the prevalent condition of global warming in these areas (Hussain & Mudasser 2007). Moreover, due to climatic fluctuations a pronounced decline has been forecasted in the production of rice and wheat, which are the staple foods of Pakistan, mainly grown in the following districts: Peshawar, Charsadda, Mardan, and Swabi within Khyber Pakhtunkhwa (Ahmad *et al.* 2015a, 2015b; Shaikoor *et al.* 2015).

The Peshawar Valley is a significant topographical zone in the upper Indus basin in Pakistan. The Kabul River gathers water from the streams and canals of the Peshawar Valley and drains it into the River Indus (Khuram *et al.* 2021). The decrease in water table ranged from 1 to 3 feet each year in the area of study, precipitation has diminished and stream water discharge showed huge disparities in river water volume over the last two decades. Research findings showed three fundamental indicators for drought, including irregular patterns of precipitation, reduced water table, and low surface water accessibility in the area of study (Idrees *et al.* 2022). Groundwater is the exclusive source of water supply in Peshawar with 1,400 public tube wells having an overall release of 8 million gallons/h. Other than these, hand pumps and dug wells are additionally providing fresh water to meet the water needs of the inhabitants. During 1981–2017, the population growth increased the demand for fresh water. In 2014, the extraction of water from ground water source was 105 mm/year, showing high extraction and low restoration of groundwater from precipitation, leading to shrinking groundwater sources, and ultimately low water table (Khan & Ali 2019). In order to fulfil the food requirements of the steadily expanding population, sewage water is being utilized for irrigation practices due to the scarcity of irrigation water in Peshawar, which might cause soil and crops contamination (Perveen *et al.* 2012).

The present research work was aimed at assessing the physio-biochemical and growth responses of barley *Hordeum vulgare* L. to calcium chloride (CaCl<sub>2</sub>) solution, its efficacy in attenuating the negative impacts of drought-induced stress, and to unveil the degree of effectiveness of CaCl<sub>2</sub> solution in regulating key metabolic activities by enhancing the drought tolerance capacity of barley cultivar exposed to varying levels of drought-induced stress conditions.

## 2. MATERIALS AND METHODS

### 2.1. Physiography and meteorology of the area of study

A pot experiment was conducted at the Department of Botany, University of Peshawar, Pakistan (34°1' 33.3012''N and 71°33' 36.4860'' E) during the spring season 2020. Peshawar is located in the Iranian plateau and has a tropical climatic condition. It is the biggest and capital city of the Khyber Pakhtunkhwa province. To the west, The Federally Administered Tribal Areas (FATA) is located and at its North Mohmand Agency shares the boundary. Likewise, Kohat district is located at its southern side. Nowshera and Charsadda districts are connected towards its north-east and north side. Peshawar is spatially extended out to 1,257 km<sup>2</sup> with an elevation of 340 m/1,115.49 feet (Figure 1). The maximum average temperature in summer goes above 40 °C and the minimum average temperature reaches 25 °C. The wind speed is around 5 knots in December to 24 knots in mid-June. In same manner, the relative humidity varies from 45% in June to 75% in August (Mehmood *et al.* 2016). Peshawar gets precipitation both in summer and winter. Relatively, average winter precipitation is on the higher side compared to summer precipitation, the annual mean monthly temperature ranges from 10.2 to 31.3 °C and mean annual rainfall is 384 mm (Nicol *et al.* 1999; Salma *et al.* 2012). Figure 2 depicts land cover of the area of study generated from Landsat data for the period 1990, 2000, 2010, and 2019, respectively.



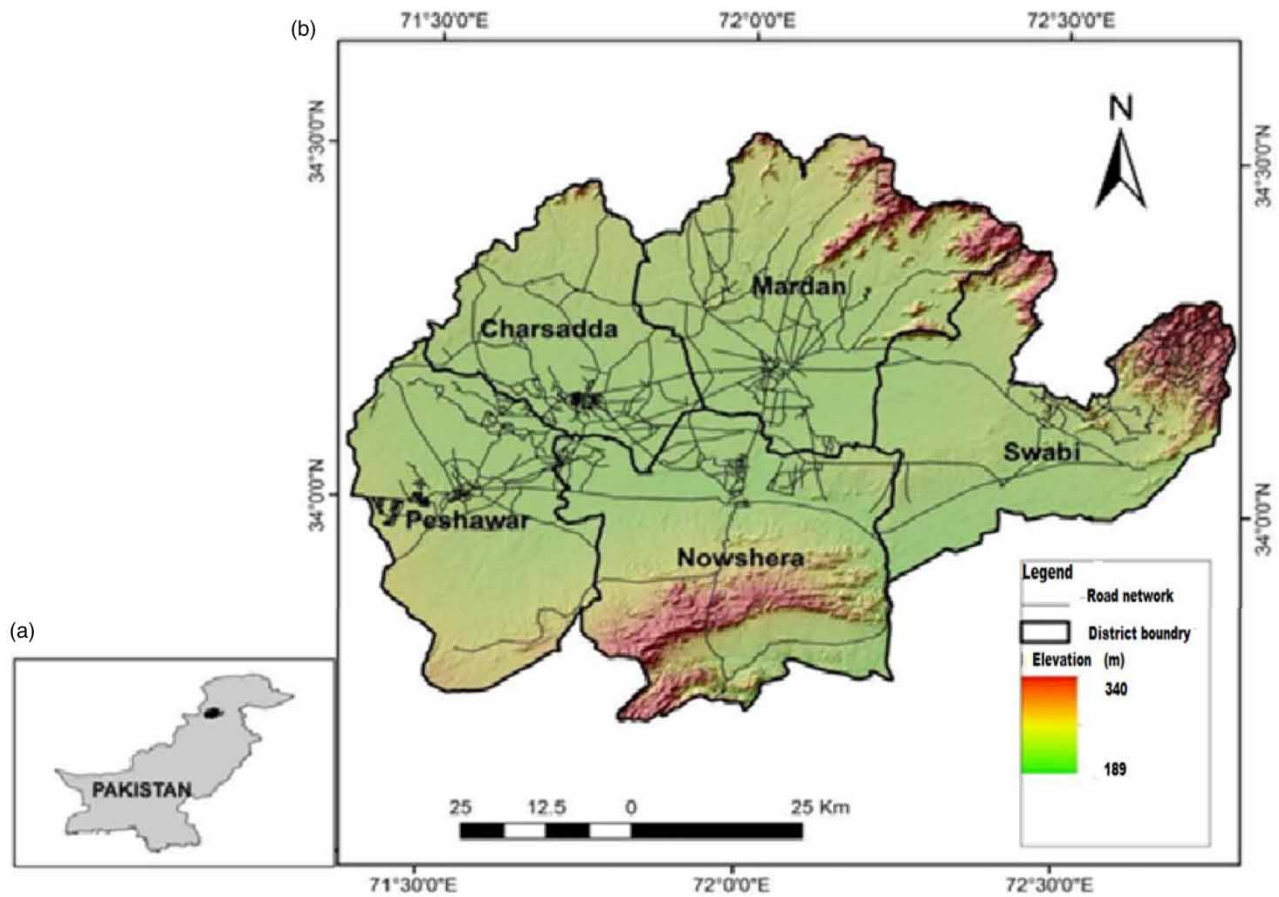

**Figure 1** | Spatial map of the study area: (a) map of Pakistan and (b) map of Peshawar. Source: Shafique *et al.* (2014).

## 2.2. Experimental design

Seeds of barley were collected from National institute of Agriculture and Research Centre (NARC), Islamabad. Surface-sterilized seeds were sown in pots of 20 cm height, 18 cm upper and lower diameter and 2 cm thickness containing clay soil, pure sand, and farmyard manure at 1:1:1. Pots were placed 5 cm apart from each other and arranged in a randomized complete block design (RCBD). Twenty seeds were sown per pot and watered normally until complete germination. Germination indices were observed meticulously and noted on a regular basis up to their vegetative maturity. Unwanted weeds were removed periodically and thinning of seedlings was maintained throughout the growing period.  $\text{CaCl}_2$  solution (10 mM) was prepared by dissolving 1.5 g of solid  $\text{CaCl}_2$  in 1 l of distilled water. The trial comprised a total of 12 sets and each set had three replicates. After 30 days of germination, the drought period was induced by exposing three sets of trial to 5, 10, and 15 days, respectively;  $\text{CaCl}_2$  solution (10 mM) was applied through roots to all the three sets exposed to varying levels of drought-induced stress conditions. Three sets of trials were taken as the control group while three sets were kept as control + drought of 5, 10, and 15 days, respectively. The remaining three sets were applied with  $\text{CaCl}_2$  solution (10 mM) without exposing to drought conditions. At the end of the drought stress periods, four plants were uprooted from each replicate, washed, and dried for the purpose of determination of growth and physio-biochemical attributes (Figure 3).

## 2.3. Soil texture, pH, electrical conductivity, and elemental analysis

Analysis of the soil used for plant growth showed sandy loam texture, which was assessed with the help of the hydrometer method (Gee & Bauder 1979). Electrical conductivity (EC) of the soil recorded was 2.57 ds/m, pH 6.5

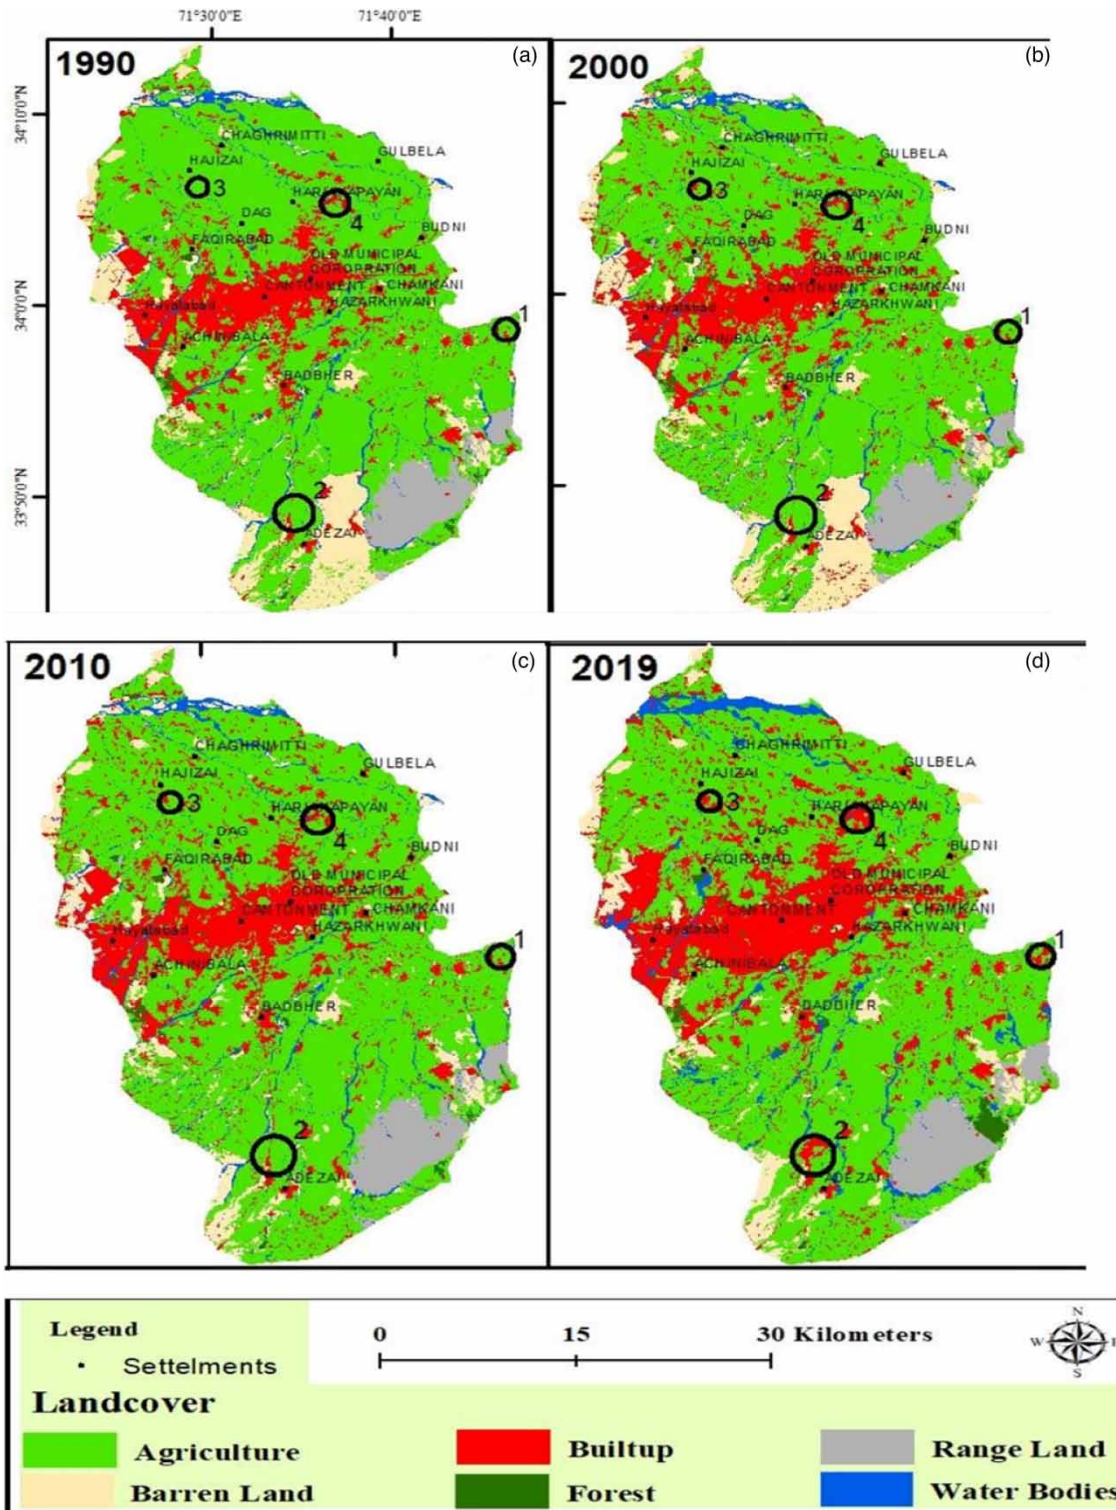

**Figure 2** | Depicts land cover generated from Landsat data for the following period: (a) 1990, (b) 2000, (c) 2010, and (d) 2019. Source: Ahmad *et al.* (2022).

(McLean 1982). Elemental analysis of the soil showed nitrogen (N) 5.22 g/kg (Keeney & Nelson 1982), organic carbon (C) 26.3 g/kg (Nelson & Sommers 1982), potassium (K) 88.4 mg/kg (Hanway & Heidel 1952), and phosphorus (P) 7.7 mg/kg (Jackson *et al.* 1973).

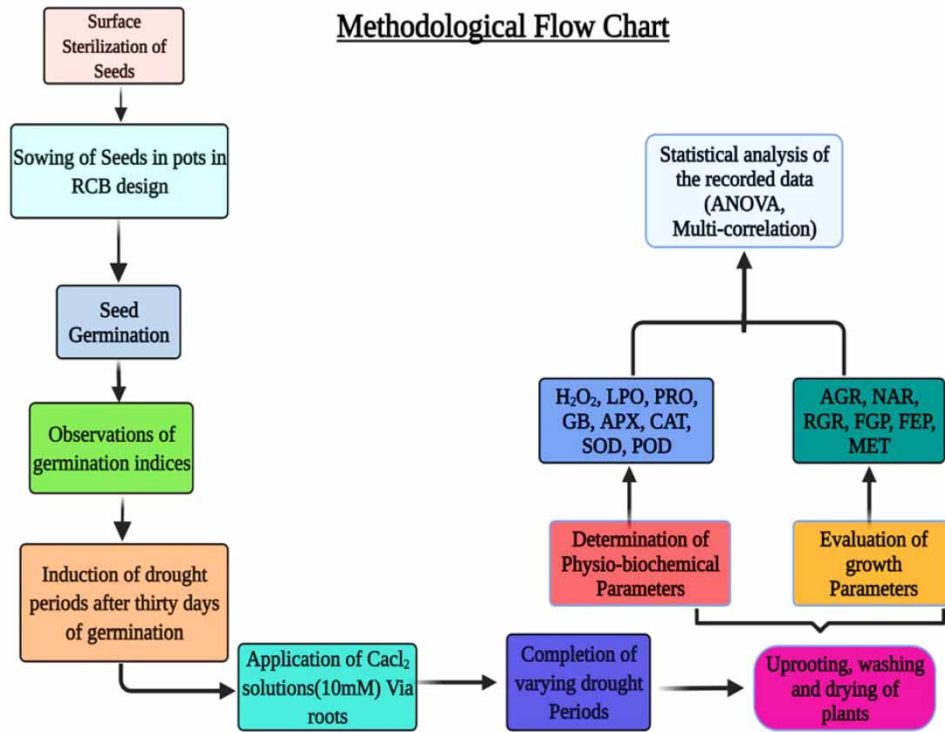

**Figure 3** | Methodological flow chart of the designed experiment.

#### 2.4. Measurement of growth attributes

Growth attributes, namely absolute growth rate (*AGR*), net assimilation rate (*NAR*), and relative growth rate (*RGR*) were calculated by following the formulas suggested by Ghule *et al.* (2013).

$$AGR = \frac{H_2 - H_1}{t_2 - t_1} \quad (1)$$

$H_1$  and  $H_2$  denoted seedling height (cm) at time  $t_1$  and  $t_2$ .

*NAR* is the amount of increase in plant dry weight per unit of assimilatory surface per unit time (g/cm /day).

$$NAR = \frac{W_2 - W_1 \times (\log_e A_2 - \log_e A_1)}{t_2 - t_1 A_2 - A_1} \text{ (g/cm /day)} \quad (2)$$

$A_1$  and  $A_2$  denoted leaf surface area in  $\text{cm}^2$  and  $W_1$  and  $W_2$  represented dry plant matter, estimated in grams at time  $t_1$  and  $t_2$ .

$$RGR = \frac{\log_e W_2 - \log_e W_1}{t_2 - t_1} \quad (3)$$

$W_1$  and  $W_2$  denoted plant dry weight (g) at time  $t_1$  and  $t_2$ ,  $\log_e$  is natural logarithm.

*FGP* was estimated by the suggested formula of Al-Ansai & Ksiksi (2018).

$$FGP = \frac{\text{The total seeds germinated at end of trial}}{\text{Number of initial seeds sown}} \times 100 \quad (4)$$

Final emergence percentage (*FEP*) and mean emergence time (*MET*) were calculated by following the formula of [Kader \(2005\)](#).

$$FEP = \frac{\text{Final no. of seedlings emerged}}{\text{Total no. of seeds sown}} \times 100 \quad (5)$$

$$MET = \frac{\sum Dn}{\sum n} \quad (6)$$

where '*D*' is the number of days counted from the beginning of emergence and '*n*' is the number of seeds that had emerged on the day '*D*'.

### 3. ASSESSMENT OF PHYSIOLOGICAL PARAMETERS

#### 3.1. Estimation of hydrogen peroxide content

Hydrogen peroxide ( $\text{H}_2\text{O}_2$ ) content was analysed by the methodology of [Velikova et al. \(2000\)](#). Fresh leaf and root material (0.5 g) were taken and grounded in 5.0 ml (0.1%) of trichloro acetic acid (TCA). The mixture was centrifuged for 10 min and 0.5 ml of supernatant was collected, 0.5 ml of phosphate buffer and 2.0 ml of potassium iodide were added to supernatant. Optical density (OD) readings were recorded at 390 nm.

#### 3.2. Estimation of lipid peroxidation

##### 3.2.1. Procedure

Lipid peroxidation (LPO) levels were measured by following the methodology of [Yang & Miao \(2010\)](#). Foliar and root material (0.5 g) were homogenized in 10 ml of trichloroacetic acid (TCA) and the samples were centrifuged for 10 min. After centrifugation, 1.0 ml of supernatant was collected and 4.0 ml of 0.5% thiobarbituric acid (TBA) in 20% TCA was mixed with it. The mixture was heated at 90 °C for 1 h. OD was noted at 532 nm.

#### 3.3. Quantification of PRO content

##### 3.3.1. Procedure

PRO content was evaluated by using the method of [Tian et al. \(2019\)](#). Fresh leaf and root content (0.5 g) were chopped in 5.0 ml of 3% sulfosalicylic acid, the mixture was filtered, and 2.0 ml of filtrate was taken. 4.0 ml of glacial acetic acid and 4.0 ml of acid ninhydrin were added to the filtrate. The mixture was heated at 100 °C for 1 h, and after heating 4 ml of toluene was added. OD readings were noted at 520 nm.

#### 3.4. Quantification of GB content

##### 3.4.1. Procedure

The amount of GB was determined using the methodology of [Di-Martino et al. \(2003\)](#). Plants foliar and root material (0.5 g) were chopped in 5 ml of distilled water. The mixture was passed through Watt man filter paper by diluting the filtrate with  $\text{H}_2\text{SO}_4$  solution. Samples were centrifuged and cold  $\text{KI-I}_2$  was added to each sample. 1.0 ml of supernatant was collected and OD was measured at 365 nm.

#### Activities of antioxidant enzymes

#### 3.5. Determination of APX activity

##### 3.5.1. Procedure

APX activity was determined by following [Salimi et al. \(2016\)](#). Fresh leaf and root material (0.5 g) were chopped in 5.0 ml of phosphate buffer and the samples were spun in a centrifuge machine for 10 min. After centrifugation, 0.1 mM  $\text{H}_2\text{O}_2$ , 0.1 mM EDTA, 0.6 mM ascorbic acid, and 0.1 ml of enzyme extract were added to each sample. Finally, OD reading was taken at 290 nm.



### 3.6. Determination of CAT activity

#### 3.6.1. Procedure

CAT approximation was determined by pursuing the method of Sewelam *et al.* (2017). Root and fresh foliar material (0.4 g) were grounded in 5 ml of phosphate buffer and the samples were kept in a centrifuge machine for 10 min at 1,000 rpm. After centrifugation, 0.1 ml of supernatant was taken and 2.0 ml of H<sub>2</sub>O<sub>2</sub> and 0.1 ml of sodium phosphate were added. OD was measured at 240 nm.

### 3.7. Estimation of SOD activity

#### 3.7.1. Procedure

SOD activity was determined by Bhardwaj *et al.* (2018). Fresh leaf and root samples (0.5 g) were grounded in 5.0 ml of phosphate buffer and the samples were spun in a centrifuge machine for 10 min. 0.1 ml of supernatant was taken from each sample and 0.72 ml of nitro blue tetrazolium (NBT), 0.72 ml of ethylenediamine tetraacetic acid (EDTA), 0.72 ml of ethanol, and 0.72 ml of riboflavin were added. OD was recorded at 560 nm.

### 3.8. Quantification of POD activity

#### 3.8.1. Procedure

POD activity was determined using the methodology of Latef (2011). Root and leaf material (0.2 g) were chopped in 5.0 ml of phosphate buffer and centrifugation was done for 10 min. Moreover, 20 mM of guaiacol and 10 mM of H<sub>2</sub>O<sub>2</sub> were added to 0.1 ml of supernatant of each sample. At the end, OD was noted at 470 nm.

### 3.9. Statistical analysis

The experiment comprised two factors including varying levels of induced drought stress (5, 10, and 15 days) and CaCl<sub>2</sub> solution (10 mM). The experimental design followed was the randomized complete blocked design (RCBD). Statistical analyses, including analysis of variance (ANOVA) and multi-correlation were performed through statistical software programmes: Statistix 10 and SPSS Statistics 24. Standard errors and mean values were determined and the least significance difference (LSD) test was performed and indicated by letters (a–i).

## 4. RESULTS

### 4.1. Effect of CaCl<sub>2</sub> on agronomic attributes of barley under water-deficit stress

Inferences from statistical analysis (Tables 1 and 2) revealed significant ( $P \leq 0.05$ ) improvement in growth parameters including AGR, RGR, and NAR, under 5, 10, and 15 days of exposure to induced drought stress supplemented with 10 mM of CaCl<sub>2</sub>

**Table 1** | Effect of calcium chloride solution on absolute growth rate, relative growth rate, and final emergence percentage under varying levels of induced drought stress

| Days | Treatments                         | AGR                          | RGR                          | FEP                           |
|------|------------------------------------|------------------------------|------------------------------|-------------------------------|
| T1   | Control                            | 1.546 ± 0.121 <sup>def</sup> | 7.875 ± 2.005 <sup>cde</sup> | 96.666 ± 38.944 <sup>ab</sup> |
| T2   | 5 days Drought                     | 1.006 ± 0.087 <sup>efg</sup> | 4.812 ± 0.114 <sup>ef</sup>  | 61.666 ± 4.714 <sup>b</sup>   |
| T3   | 5 days Drought + calcium chloride  | 0.813 ± 0.073 <sup>a</sup>   | 5.695 ± 0.658 <sup>ab</sup>  | 73.333 ± 4.721 <sup>b</sup>   |
| T4   | Calcium chloride                   | 1.441 ± 0.101 <sup>a</sup>   | 8.719 ± 1.082 <sup>ab</sup>  | 70.2 ± 4.082 <sup>bc</sup>    |
| T5   | Control                            | 0.061 ± 1.058 <sup>ghi</sup> | 1.612 ± 0.493 <sup>fg</sup>  | 65.1 ± 29.533 <sup>bc</sup>   |
| T6   | 10 days Drought                    | 0.541 ± 0.114 <sup>hi</sup>  | 0.629 ± 0.193 <sup>g</sup>   | 65.11 ± 8.164 <sup>bc</sup>   |
| T7   | 10 days Drought + calcium chloride | 0.413 ± 0.275 <sup>ab</sup>  | 0.721 ± 0.302 <sup>a</sup>   | 71.666 ± 36.591 <sup>bc</sup> |
| T8   | Calcium chloride                   | 0.506 ± 0.245 <sup>ab</sup>  | 2.272 ± 0.601 <sup>ab</sup>  | 68.333 ± 6.236 <sup>bc</sup>  |
| T9   | Control                            | 3.666 ± 1.546 <sup>b</sup>   | 17.039 ± 4.341 <sup>b</sup>  | 65.112 ± 31.885 <sup>bc</sup> |
| T10  | 15 days Drought                    | 2.346 ± 0.073 <sup>cd</sup>  | 9.149 ± 0.597 <sup>c</sup>   | 60.12 ± 4.082 <sup>c</sup>    |
| T11  | 15 days Drought + calcium chloride | 1.693 ± 0.378 <sup>bc</sup>  | 10.945 ± 0.978 <sup>b</sup>  | 60.11 ± 30.912 <sup>c</sup>   |
| T12  | Calcium chloride                   | 3.373 ± 0.405 <sup>a</sup>   | 12.072 ± 2.765 <sup>a</sup>  | 65.111 ± 4.082 <sup>bc</sup>  |

AGR, absolute growth rate; RGR, relative growth rate; FEP, final emergence percentage.

(Mean ± standard error) letters (a–i) indicating least significance difference among the mean values at  $p \leq 0.05$ .

**Table 2** | Effect of calcium chloride solution on final germination percentage, net assimilation rate, and mean emergence time under varying levels of induced drought stress

| Days | Treatments                         | FGP                            | NAR                         | MET                           |
|------|------------------------------------|--------------------------------|-----------------------------|-------------------------------|
| T1   | Control                            | 76.666 ± 8.498 <sup>b</sup>    | 1.774 ± 0.233 <sup>cd</sup> | 1.133 ± 1.331 <sup>ab</sup>   |
| T2   | 5 days Drought                     | 91.666 ± 4.714 <sup>cd</sup>   | 1.034 ± 0.095 <sup>ef</sup> | 3.144 ± 3.349 <sup>cd</sup>   |
| T3   | 5 days Drought + calcium chloride  | 73.333 ± 6.236 <sup>abcd</sup> | 1.291 ± 0.135 <sup>a</sup>  | 0.288 ± 0.317 <sup>cd</sup>   |
| T4   | Calcium chloride                   | 70 ± 4.082 <sup>bc</sup>       | 2.154 ± 0.073 <sup>a</sup>  | 1.777 ± 1.938 <sup>bcd</sup>  |
| T5   | Control                            | 65 ± 4.082 <sup>bc</sup>       | 0.512 ± 0.451 <sup>fg</sup> | 0.611 ± 0.735 <sup>d</sup>    |
| T6   | 10 days Drought                    | 65 ± 8.164 <sup>bcd</sup>      | 0.151 ± 0.287 <sup>h</sup>  | 2.21 ± 2.336 <sup>def</sup>   |
| T7   | 10 days Drought + calcium chloride | 71.666 ± 8.498 <sup>cd</sup>   | 0.142 ± 0.218 <sup>ab</sup> | 1.655 ± 1.963 <sup>abc</sup>  |
| T8   | Calcium chloride                   | 68.333 ± 6.236 <sup>bc</sup>   | 0.087 ± 0.238 <sup>a</sup>  | 1.388 ± 1.963 <sup>ab</sup>   |
| T9   | Control                            | 65 ± 4.082 <sup>bc</sup>       | 4.301 ± 0.614 <sup>b</sup>  | 1.377 ± 1.541 <sup>abcd</sup> |
| T10  | 15 days Drought                    | 60 ± 4.082 <sup>c</sup>        | 1.728 ± 0.195 <sup>cd</sup> | 0.6 ± 0.734 <sup>bcd</sup>    |
| T11  | 15 days Drought + calcium chloride | 60 ± 8.164 <sup>c</sup>        | 2.104 ± 0.135 <sup>ab</sup> | 2.833 ± 3.252 <sup>abc</sup>  |
| T12  | Calcium chloride                   | 65 ± 4.082 <sup>bc</sup>       | 5.754 ± 0.555 <sup>a</sup>  | 2.166 ± 2.301 <sup>abc</sup>  |

FGP, final germination percentage; NAR, net assimilation rate; MET, mean emergence time.

solution in comparison with the control and the rest of the groups. On the contrary, these parameters were noted to be negatively affected in the group which was exposed to varying levels of induced drought stress with no CaCl<sub>2</sub> application. Moreover, growth parameters including FEP, final germination percentage (FGP), and MET exposed to 5, 10, and 15 days of the induced drought stress condition responded negatively. Moreover, application of 10 mM CaCl<sub>2</sub> solution did not cause any significant improvement in these parameters under varying levels of induced drought stress as compared to the control group.

## 4.2. Effect of CaCl<sub>2</sub> on physiological attributes of barley under water-deficit stress

### 4.2.1. Effect on H<sub>2</sub>O<sub>2</sub> concentration

Varying levels (5, 10, and 15 days) of induced water stressed condition significantly ( $P \leq 0.05$ ) boosted the concentration of H<sub>2</sub>O<sub>2</sub> content in both leaf and root. Comparing with control group and rest of the groups, CaCl<sub>2</sub> (10 mM) applied under all the drought levels lowered down the quantity of H<sub>2</sub>O<sub>2</sub> content in leaf and root (Figure 4; Table 3).

### 4.2.2. Effect on lipid peroxide content

All the levels of limited water regimes significantly ( $P \leq 0.05$ ) enhanced the concentration of lipid peroxide (LPO) content in foliar material and root. In contrast with control group and all other groups, application of CaCl<sub>2</sub> (10 mM) solution under all

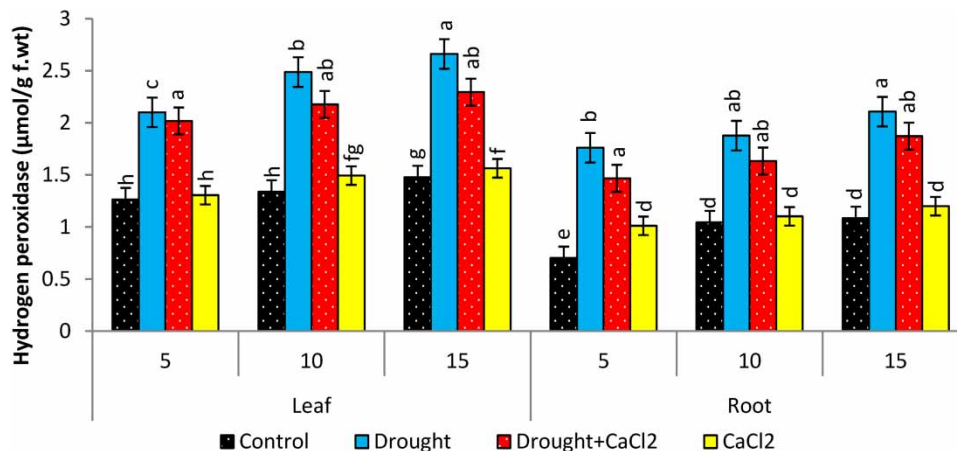

**Figure 4** | Effect of CaCl<sub>2</sub> on H<sub>2</sub>O<sub>2</sub> content in *Hordeum vulgare* L. under varying levels of induced drought stress (mean ± standard error). Letters (a–h) indicate least significance difference among the mean values at  $p \leq 0.05$ .

**Table 3** | Analysis of variance of the measured physio-biochemical parameters with calcium chloride application under varying levels of induced drought stress

| Trait                            | Source of variance  | SS    | df | MS    | F       | P        |
|----------------------------------|---------------------|-------|----|-------|---------|----------|
| LPO-L                            | Drought             | 0.041 | 3  | 0.014 | 34.622  | 0.056*   |
|                                  | Treatment           | 0.049 | 11 | 0.004 | 22.755  | 0.005    |
|                                  | Drought + Treatment | 0.052 | 12 | 0.004 | 46.772  | 0.008**  |
|                                  | Error               | 0.002 | 23 | 9.180 |         |          |
| LPO-r                            | Drought             | 0.051 | 3  | 0.017 | 44.372  | 0.565*   |
|                                  | Treatment           | 0.058 | 11 | 0.005 | 21.531  | 0.089    |
|                                  | Drought + Treatment | 0.062 | 12 | 0.005 | 84.310  | 0.004**  |
|                                  | Error               | 0.001 | 23 | 6.159 |         |          |
| GB-L                             | Drought             | 0.086 | 3  | 0.029 | 11.717  | 0.004**  |
|                                  | Treatment           | 0.157 | 11 | 0.014 | 45.429  | 0.367    |
|                                  | Drought + Treatment | 0.158 | 12 | 0.013 | 44.224  | 0.005**  |
|                                  | Error               | 0.007 | 23 | 0.000 |         |          |
| GB-r                             | Drought             | 0.097 | 3  | 0.032 | 11.467  | 0.005**  |
|                                  | Treatment           | 0.180 | 11 | 0.016 | 49.828  | 0.007    |
|                                  | Drought + Treatment | 0.181 | 12 | 0.015 | 50.476  | 0.021**  |
|                                  | Error               | 0.007 | 23 | 0.000 |         |          |
| PRO-L                            | Drought             | 0.209 | 3  | 0.070 | 14.114  | 0.008**  |
|                                  | Treatment           | 0.360 | 11 | 0.033 | 107.824 | 0.000    |
|                                  | Drought + Treatment | 0.362 | 12 | 0.030 | 121.105 | 0.004**  |
|                                  | Error               | 0.006 | 23 | 0.000 |         |          |
| PRO-r                            | Drought             | 0.088 | 3  | 0.029 | 12.977  | 0.089    |
|                                  | Treatment           | 0.152 | 11 | 0.014 | 38.543  | 0.000*   |
|                                  | Drought + Treatment | 0.152 | 12 | 0.013 | 36.986  | 0.002*** |
|                                  | Error               | 0.008 | 23 | 0.000 |         |          |
| H <sub>2</sub> O <sub>2</sub> -L | Drought             | 3.478 | 3  | 1.159 | 7.191   | 0.041*   |
|                                  | Treatment           | 8.537 | 11 | 0.776 | 187.277 | 0.059    |
|                                  | Drought + Treatment | 8.580 | 12 | 0.715 | 294.871 | 0.021*   |
|                                  | Error               | 0.056 | 23 | 0.002 |         |          |
| H <sub>2</sub> O <sub>2</sub> -r | Drought             | 3.012 | 3  | 1.004 | 8.120   | 0.000*   |
|                                  | Treatment           | 6.387 | 11 | 0.581 | 23.928  | 0.023    |
|                                  | Drought + Treatment | 6.410 | 12 | 0.534 | 21.966  | 0.003**  |
|                                  | Error               | 0.559 | 23 | 0.024 |         |          |
| APX-L                            | Drought             | 0.051 | 3  | 0.017 | 28.553  | 0.521    |
|                                  | Treatment           | 0.052 | 11 | 0.005 | 6.316   | 0.065    |
|                                  | Drought + Treatment | 0.060 | 12 | 0.005 | 12.929  | 0.007**  |
|                                  | Error               | 0.009 | 23 | 0.000 |         |          |
| APX-r                            | Drought             | 0.003 | 3  | 0.001 | 9.424   | 0.013*   |
|                                  | Treatment           | 0.005 | 11 | 0.000 | 5.599   | 0.005    |
|                                  | Drought + Treatment | 0.005 | 12 | 0.000 | 5.220   | 0.005**  |
|                                  | Error               | 0.002 | 23 | 7.397 |         |          |
| CAT-L                            | Drought             | 0.133 | 3  | 0.044 | 47.245  | 0.032*   |

(Continued.)

Table 3 | Continued

| Trait | Source of variance  | SS                 | df | MS    | F       | P        |
|-------|---------------------|--------------------|----|-------|---------|----------|
| CAT-r | Treatment           | 0.158 <sup>a</sup> | 11 | 0.014 | 63.158  | 0.000    |
|       | Drought + Treatment | 0.162              | 12 | 0.013 | 225.285 | 0.001*** |
|       | Error               | 0.001              | 23 | 5.98  |         |          |
|       | Drought             | 0.124 <sup>a</sup> | 3  | 0.041 | 39.375  | 0.098**  |
| SOD-L | Treatment           | 0.154 <sup>a</sup> | 11 | 0.014 | 75.660  | 0.007    |
|       | Drought + Treatment | 0.157              | 12 | .013  | 215.540 | 0.005**  |
|       | Error               | 0.001              | 23 | 6.063 |         |          |
|       | Drought             | 0.042 <sup>a</sup> | 3  | 0.014 | 14.300  | 0.000*** |
| SOD-r | Treatment           | 0.071 <sup>a</sup> | 11 | 0.006 | 49.051  | 0.000    |
|       | Drought + Treatment | 0.073              | 12 | 0.006 | 141.622 | 0.000*** |
|       | Error               | 0.001              | 23 | 4.290 |         |          |
|       | Drought             | 0.028 <sup>a</sup> | 3  | 0.009 | 13.012  | 0.006**  |
| POD-L | Treatment           | 0.049 <sup>a</sup> | 11 | 0.004 | 38.287  | 0.313    |
|       | Drought + Treatment | 0.050              | 12 | 0.004 | 79.946  | 0.001**  |
|       | Error               | 0.001              | 23 | 5.22  |         |          |
|       | Drought             | 0.053 <sup>a</sup> | 3  | 0.018 | 15.359  | 0.009**  |
| POD-r | Treatment           | 0.086 <sup>a</sup> | 11 | 0.008 | 45.027  | 0.067    |
|       | Drought + Treatment | 0.088              | 12 | 0.007 | 75.055  | 0.004**  |
|       | Error               | 0.002              | 23 | 9.779 |         |          |
|       | Drought             | 0.055 <sup>a</sup> | 3  | 0.018 | 9.314   | 0.012**  |
|       | Treatment           | 0.113 <sup>a</sup> | 11 | 0.010 | 52.479  | 0.008    |
|       | Drought + Treatment | 0.115              | 12 | 0.010 | 80.805  | 0.001**  |
|       | Error               | 0.003              | 23 | 0.000 |         |          |

LPO-L, lipid peroxide in leaf; LPO-r lipid peroxide in root; GB-L, glycine betaine in leaf; GB-r, glycine betaine in root; PRO-L, proline in leaf; PRO-r, proline in root; H<sub>2</sub>O<sub>2</sub>-L, hydrogen peroxide in leaf; H<sub>2</sub>O<sub>2</sub>-r, hydrogen peroxide in root; APX-L ascorbate peroxidase in leaf; APX-r, ascorbate peroxidase in root; CAT-L catalase in leaf; CAT-r catalase in root; SOD-L, superoxide dismutase in leaf; SOD-r, superoxide dismutase in root; POD-L peroxidase in leaf; POD-r, peroxidase in root; SS, sum of square; Df, degree of freedom; MS, mean square; F, variation between sample means; P, probability value.

\*Correlation is significant at 0.05.

\*\*Correlation is significant at 0.01.

the induced drought stress levels did not show any significant decrease in the levels of LPO content in leaf as well as in root (Figure 5; Table 3).

#### 4.2.3. Changes in total PRO concentration

From statistical analysis it was concluded that water-deficit stress conditions increased total PRO levels. On the contrary, CaCl<sub>2</sub> application under varying levels of induced drought stress significantly ( $P \leq 0.05$ ) enhanced total PRO content as compared to control, drought, and rest of the groups (Figure 6; Table 3)

#### 4.2.4. Changes in GB levels

Likewise, total PRO content, increase was noted in the levels of GB content. In comparison with the control group and rest of the groups, application of 10 mM of CaCl<sub>2</sub> solution under water-stressed conditions showed significant ( $P \leq 0.05$ ) enhancement in GB content (Figure 7; Table 3).

#### 4.2.5. Effect on APX activity

Varying levels of induced drought stress condition in combination with CaCl<sub>2</sub> (10 mM) significantly ( $P \leq 0.05$ ) increased APX activity in both root and leaf. The amount of APX increased with increasing the duration of drought stress level. In



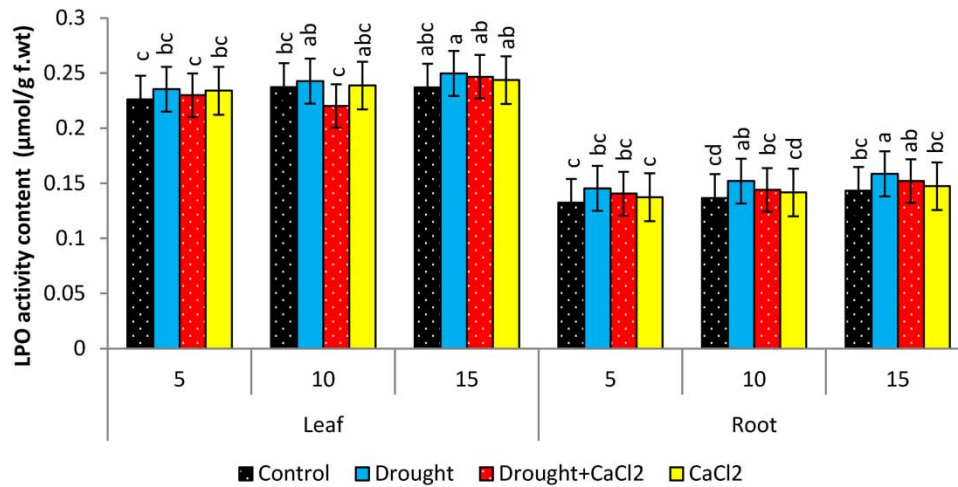

**Figure 5** | Effect of CaCl<sub>2</sub> on lipid peroxide activity in *Hordeum vulgare* L. under varying levels of induced drought stress (mean ± standard error). Letters (a–d) indicate least significance difference among the mean values at  $p \leq 0.05$ .

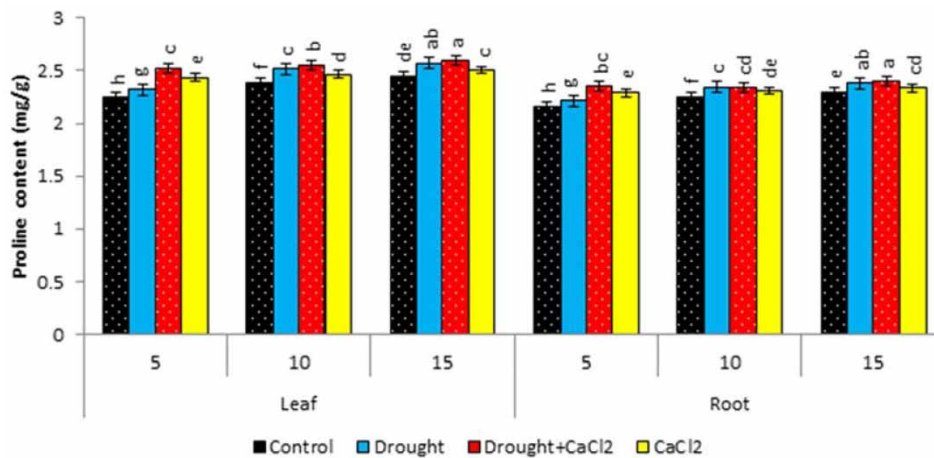

**Figure 6** | Effect of CaCl<sub>2</sub> on proline accumulation in *Hordeum vulgare* L. under varying levels of induced drought stress (mean ± standard error). Letters (a–h) indicate least significance difference among the mean values at  $p \leq 0.05$ .

comparison with control group and other groups, higher APX activity was observed in the group which was treated with CaCl<sub>2</sub> application under varying levels of induced drought stress condition (Figure 8; Table 3).

#### 4.2.6. Responses of CAT activity

Results from statistical analysis showed that the drought stress regimes adversely affected the plant enzymatic system. Different levels of induced drought stress (5, 10, and 15 days) individually and in combination with CaCl<sub>2</sub> (10 mM) application significantly ( $P \leq 0.05$ ) enhanced the activity of CAT in roots and leaves, as compared to the control group and other groups (Figure 9; Table 3).

#### 4.2.7. Responses of SOD activity

Application of 10 mM of CaCl<sub>2</sub> via roots had a pronounced effect on the enzymatic system under induced drought stress situations. On exposure to varying drought stress levels and application of CaCl<sub>2</sub> (10 mM) solution, a significant ( $P \leq 0.05$ ) increase was noted in SOD activity in both roots and leaves of the studied variety of barley (Figure 10; Table 3).

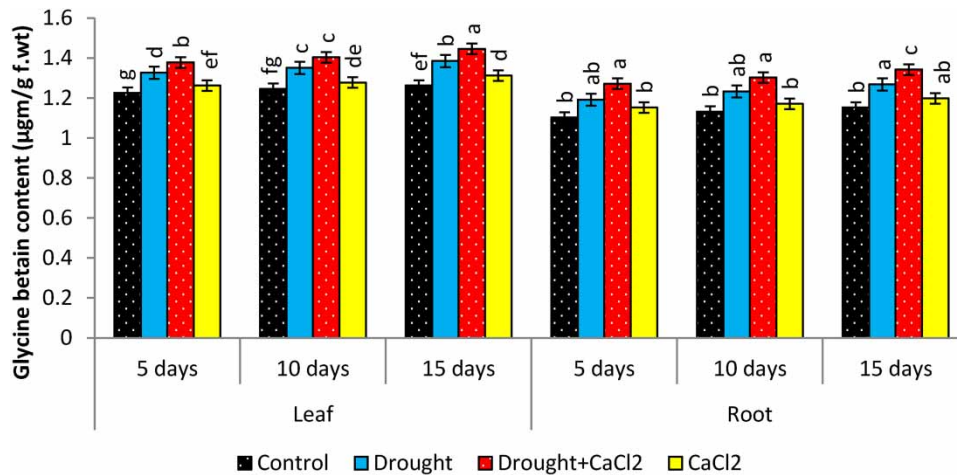

**Figure 7** | Effect of CaCl<sub>2</sub> on glycine betaine in *Hordeum vulgare* L. under varying levels of induced drought stress (mean ± standard error). Letters (a–g) indicate least significance difference among the mean values at  $p \leq 0.05$ .

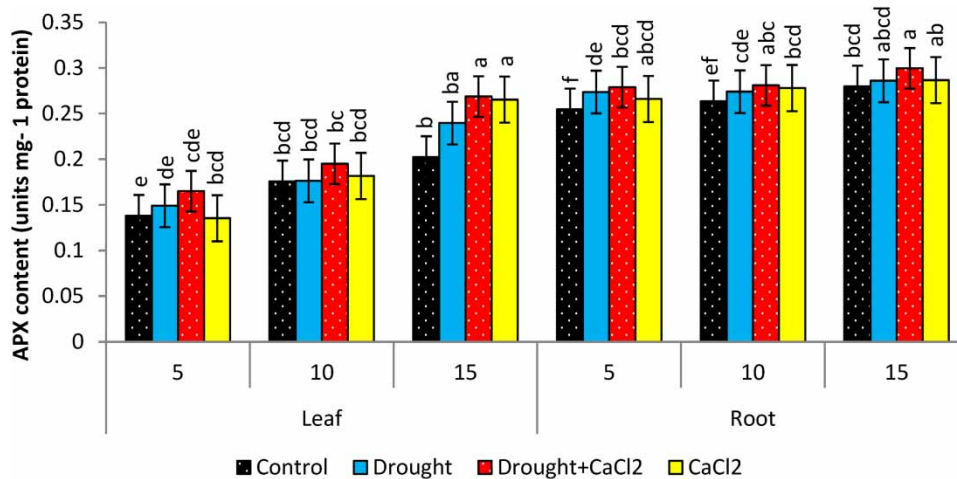

**Figure 8** | Effect of CaCl<sub>2</sub> on APX activity in *Hordeum vulgare* L. under varying levels of induced drought stress (mean ± standard error). Letters (a–f) indicate least significance difference among the mean values at  $p \leq 0.05$ .

#### 4.2.8. Effect on POD activity

With increasing levels of induced water-deficit stress condition, POD showed a notable increase. Application of 10 mM of CaCl<sub>2</sub> solution under varying drought stress regimes further enhanced POD activity to a significant ( $P \leq 0.05$ ) level both in roots and leaves (Figure 11; Table 3).

#### 4.2.9. Multi-correlation analysis of physiological and biochemical attributes of barley

Multi-correlation analysis among physio-biochemical attributes of barley (Table 4) showed that lipid peroxide in root (LPO-r) significantly ( $P = 0.05$ ) correlated with lipid peroxide in leaf (LPO-L). Likewise, glycine betaine in leaf (GB-L) indicated significant ( $P = 0.05$ ) correlation with LPO-L and LPO-r. Moreover, PRO content in leaf (PRO-L) with GB-L, H<sub>2</sub>O<sub>2</sub> in leaf (H<sub>2</sub>O<sub>2</sub>-L) showed a positive correlation with LPO-L and LPO-r. Similarly, H<sub>2</sub>O<sub>2</sub>-r showed a positive correlation with LPO-L, LPO-r, and H<sub>2</sub>O<sub>2</sub>-L. APX-L and APX-r presented a positive and significant ( $P = 0.05$ ) correlation with GB-L, GB-r, PRO-L, and PRO-r. All the enzymes of root and leaves showed a positive and significant correlation with each other and also with osmolyte content of root and leaves which mainly included PRO and GB. From multi-correlation analysis it was suggested that osmoprotectants and antioxidant enzymes work in a synchronized manner and correlated positively during

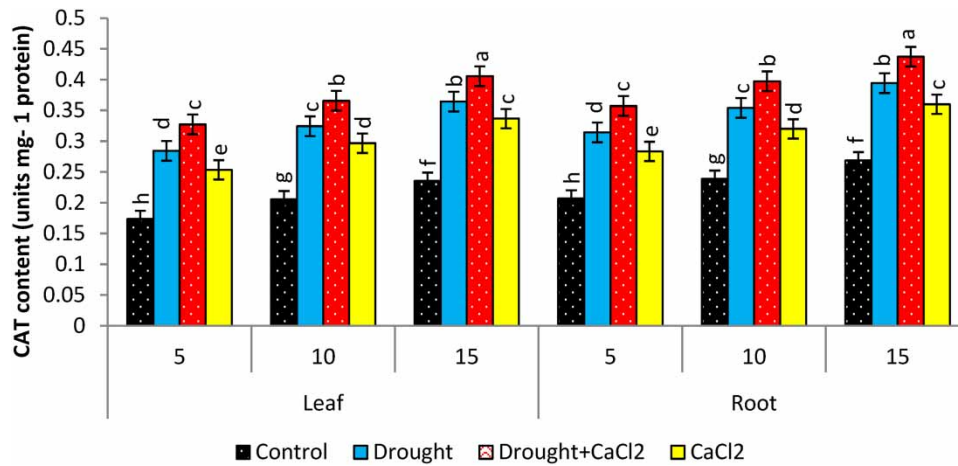

**Figure 9** | Effect of CaCl<sub>2</sub> on catalase activity in *Hordeum vulgare* L. under varying levels of induced drought stress (mean ± standard error). Letters (a–h) indicate least significance difference among the mean values at  $p \leq 0.05$ .

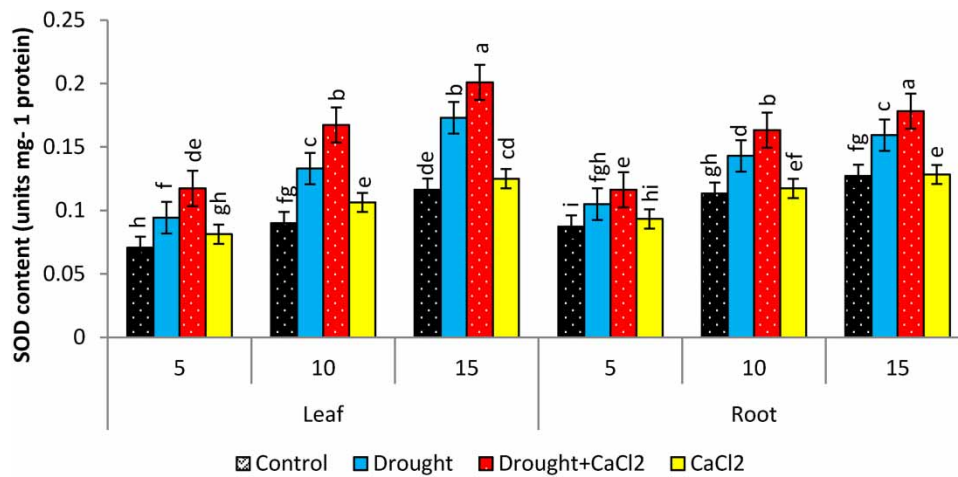

**Figure 10** | Effect of CaCl<sub>2</sub> on superoxide dismutase activity in *Hordeum vulgare* L. under varying levels of induced drought stress (mean ± standard error). Letters (a–i) indicate least significance difference among the mean values at  $p \leq 0.05$ .

stress conditions. Beside these results, a negatively significant ( $P = 0.05$ ) correlation was noted between all the antioxidant enzymes with H<sub>2</sub>O<sub>2</sub> and LPO content both in root and leaf.

## 5. DISCUSSION

Continuous changes in environmental conditions have been proving dangerous for biotic components on earth; water-deficit stress is one of the dire consequences of changes in climatic conditions. It is experimentally proven that drought stress impedes plant growth and development. Plants have adopted the internal defence mechanism in the form of antioxidant enzymes and production of osmoprotectants such as PRO and GB, which reduce the damaging effects of oxidative stress by maintaining the salt and water balance (Khan *et al.* 2010a, 2010b, 2010c). Notably, drought-stressed situation results in stomatal closure with reduced carbon dioxide exchange by diminishing the rate of photosynthesis that eventually decreases plant total biomass (Avramova *et al.* 2015).

Interpretation from statistical analysis (Tables 1 and 2) revealed a significant ( $P \leq 0.05$ ) increase in growth parameters including AGR, RGR, and NAR exposed to 5, 10, and 15 days of drought stress supplemented with 10 mM of CaCl<sub>2</sub> solution, while these parameters were noted to be affected negatively in the rest of the groups. Moreover, growth parameters including

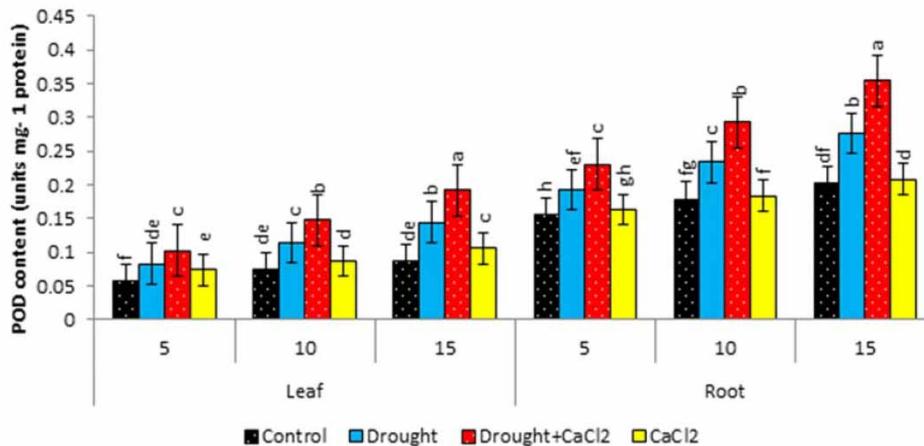

**Figure 11** | Effect of  $\text{CaCl}_2$  on peroxidase activity in *Hordeum vulgare* L. under varying levels of induced drought stress (mean  $\pm$  standard error). Letters (a–h) indicate least significance difference among the mean values at  $p \leq 0.05$ .

FEP, FGP, and MET exposed to 5, 10, and 15 days of induced drought stress condition responded negatively. Application of 10 mM  $\text{CaCl}_2$  solution did not cause any significant improvement in these parameters under varying levels of induced drought stress as compared to the control group. Therefore, it confirmed the results obtained by *Abdelly et al. (2015)* in sunflower; by *Ayad et al. (2009)* in *Geranium* cultivar; by *Mekki et al. (2015)* in cotton plant; and *Semida et al. (2014)* in *Vicia faba* cultivar. Results in *Tables 1 and 2* show AGR, RGR, NAR, FEP, FGP and MET, which showed improvement in the control group and affected negatively in the groups which were exposed to varying levels of induced drought stress with no  $\text{CaCl}_2$  application, thus confirming the same investigation achieved by *Sardoei & Mohammadi (2014)*. Reduction in growth parameters such as AGR, RGR, and NAR are closely related to cytokinesis and cell elongation under drought stress regimes. It is believed that this reduction is due to stomatal closure and diminished photosynthesis, persistent exposure to water limited regimes eventually leading to shrinkage of leaves (*Zaheer et al. 2019*).

Water-deficit condition is characterized by low water content, reduced turgidity, wilting, closure of stomata, and eventually decrease in cell enlargement and growth; plant growth is variously influenced by internal and external factors; despite its genetic makeup, examination of external morphology is an essential tool for the evaluation of crop productivity and total biomass (*Sestak et al. 1971*). Extensive root growth during drought stress regimes is a fundamental adaptation mechanism in drought-tolerant plants; however, in drought susceptible species, the growth of the root system is adversely affected (*Passioura 1982*). It has been reported that water stress conditions decreased the root length in *Populus* species (*Yin et al. 2005*). Similarly, Stem length decreased in *Albizzia* seedlings under water limited conditions (*Sundaravalli & Paliwal 2005*). Leaf area and root to shoot ratio are important to maintain control of water use in plants. Leaf area, RGR, and AGR are reported to be significantly reduced under the drought stress (*Yadav et al. 2005*). Reduced leaf area under water-deficient regimes is the main factor behind inefficient photosynthesis and low crop yield (*Kramer 1983*). Under drought stress conditions reduction in plant height might be linked with poor cell enlargement and growth owing to the low turgor pressure and more leaf senescence (*Rane et al. 2001*). Drought stress suppresses the photochemical proficiency of the photosystem (PS-II) by diminishing electron transport, removal of extrinsic proteins, and release of magnesium and calcium ions from their binding, that ultimately leading to photosynthetic pigments degeneration and low total plant biomass (*Wahid et al. 2007; Barta et al. 2010*).

Water-deficient stress condition significantly ( $P \leq 0.05$ ) boosted the concentration of  $\text{H}_2\text{O}_2$  content in both parts (leaf and root) of barley, whereas comparing with control group and rest of the groups  $\text{CaCl}_2$  solution (10 mM) under varying levels of induced drought stress condition lowered the quantity of  $\text{H}_2\text{O}_2$  content in leaf and root (*Figure 4; Table 1*). Biotic and abiotic stresses induce the overproduction of  $\text{H}_2\text{O}_2$  in plant cells,  $\text{H}_2\text{O}_2$  can directly lead to damage cell membranes, proteins, and nucleic acids (*Wang et al. 2009*). Products like MDA, PRO, and  $\text{H}_2\text{O}_2$  are generally known as stress markers. A pronounced increase has been noted in the levels of MDA, PRO, and  $\text{H}_2\text{O}_2$  during oxidative stress regimes (*Khan et al. 2010a, 2010b, 2010c*).



**Table 4** | Multi-correlation analysis of physiological and biochemical components of *Hordium vulgare* L. with calcium chloride application under varying levels of induced drought stress

| Trait                            | LPO-L   | LPO-r   | GB-L    | GB-r    | Pro-L   | Pro-r   | H <sub>2</sub> O <sub>2</sub> -L | H <sub>2</sub> O <sub>2</sub> -r | APX-L   | APX-r   | CAT-L   | CAT-r   | SOD-L   | SOD-r   | POD-L   | POD-r |
|----------------------------------|---------|---------|---------|---------|---------|---------|----------------------------------|----------------------------------|---------|---------|---------|---------|---------|---------|---------|-------|
| LPO-L                            | 1.0     |         |         |         |         |         |                                  |                                  |         |         |         |         |         |         |         |       |
| LPO-r                            | 0.517*  | 1.0     |         |         |         |         |                                  |                                  |         |         |         |         |         |         |         |       |
| GB-L                             | 0.448** | 0.544** | 1.0     |         |         |         |                                  |                                  |         |         |         |         |         |         |         |       |
| GB-r                             | 0.312   | 0.151   | 0.085   | 1.0     |         |         |                                  |                                  |         |         |         |         |         |         |         |       |
| PRO-L                            | 0.551   | 0.615   | 0.794** | 0.092   | 1.0     |         |                                  |                                  |         |         |         |         |         |         |         |       |
| PRO-r                            | 0.555   | 0.640   | 0.755   | 0.100   | 0.965   | 1.0     |                                  |                                  |         |         |         |         |         |         |         |       |
| H <sub>2</sub> O <sub>2</sub> -L | 0.432** | 0.692** | 0.779   | 0.208   | 0.569   | 0.547   | 1.0                              |                                  |         |         |         |         |         |         |         |       |
| H <sub>2</sub> O <sub>2</sub> -r | 0.515** | 0.718** | 0.781   | 0.176   | 0.635   | 0.623   | 0.945**                          | 1.0                              |         |         |         |         |         |         |         |       |
| APX-L                            | 0.549   | 0.472** | 0.494** | 0.07**  | 0.664** | 0.689** | 0.252**                          | 0.349**                          | 1.0     |         |         |         |         |         |         |       |
| APX-r                            | 0.461** | 0.271** | 0.431** | 0.019** | 0.610** | 0.606** | 0.209**                          | 0.244**                          | 0.591   | 1.0     |         |         |         |         |         |       |
| CAT-L                            | 0.546   | 0.645** | 0.915** | 0.051** | 0.871** | 0.839** | 0.750**                          | 0.761**                          | 0.634** | 0.646** | 1.0     |         |         |         |         |       |
| CAT-r                            | 0.536** | 0.647** | 0.928** | 0.052** | 0.871** | 0.842** | 0.762**                          | 0.775**                          | 0.623** | 0.620   | 0.995** | 1.0     |         |         |         |       |
| SOD-L                            | 0.524   | 0.583** | 0.880** | 0.047** | 0.807** | 0.773** | 0.659**                          | 0.692**                          | 0.700   | 0.459   | 0.854   | 0.867** | 1.0     |         |         |       |
| SOD-r                            | 0.477   | 0.537** | 0.909** | 0.082** | 0.819   | 0.761** | 0.674**                          | 0.694**                          | 0.613** | 0.443** | 0.875** | 0.886   | 0.976** | 1.0     |         |       |
| POD-L                            | 0.517   | 0.633** | 0.888** | 0.011** | 0.820** | 0.790** | 0.700**                          | 0.732**                          | 0.657** | 0.445   | 0.879   | 0.896   | 0.971   | 0.953   | 1.0     |       |
| POD-r                            | 0.482** | 0.577** | 0.902** | 0.005** | 0.786** | 0.754** | 0.704**                          | 0.724**                          | 0.607   | 0.386*  | 0.848** | 0.872** | 0.970** | 0.956** | 0.983** | 1.0   |

LPO-L, lipid peroxide in leaf; LPO-r lipid peroxide in root; GB-L, glycine betaine in leaf; GB-r, glycine betaine in root; PRO-L, proline in leaf; PRO-r, proline in root; H<sub>2</sub>O<sub>2</sub>-L, hydrogen peroxide in leaf; H<sub>2</sub>O<sub>2</sub>-r, hydrogen peroxide in root; APX-L, ascorbate peroxidase in leaf; APX-r, ascorbate peroxidase in root; CAT-L, catalase in leaf; CAT-r, catalase in root; SOD-L, superoxide dismutase in leaf; SOD-r, superoxide dismutase in root; POD-L, peroxidase in leaf; POD-r, peroxidase in root.

\*Correlation is significant at 0.05.

\*\*Correlation is significant at 0.01.

Drought being a major abiotic stress causes the over production of  $H_2O_2$  in plants, leading to damage to the plasma membrane and other biomolecules. According to previous findings,  $H_2O_2$  concentration tends to increase with increasing salinity and drought. It is reported that application of  $CaCl_2$  solution in combination with NaCl solution slightly reduced  $H_2O_2$  content in various plants exposed to drought stress regimes (Wang *et al.* 2009). Our results were closely parallel with the findings made by Jaleel *et al.* (2007a, 2007b), who studied the effects of  $CaCl_2$  solution on *Catharanthus roseus* grown under drought stress and noted a clear reduction in  $H_2O_2$  content.

Varying limited water situation (5, 10, and 15 days) significantly ( $P \leq 0.05$ ) enhanced the concentration of LPO content in foliar material and root of barley. In contrast with the control group and all other groups, treatment with  $CaCl_2$  solution (10 mM) in combination with varying levels of induced drought stress decreased the levels of LPO content in leaf and root (Figure 5; Table 3).

LPO is generally quantified in the form of malondialdehyde (MDA) content. Under drought conditions, LPO takes place as a result of oxidative damage to plasma membrane by the production of reactive oxygen species (ROS) and other free radicals (Hernandez & Almansa 2002).  $CaCl_2$  is a vital macro-nutrient absorbed by roots and used directly as an osmotic solute for osmotic adjustment. The exogenous application of  $CaCl_2$  promoted the defence mechanism in plants under water stress, salinity stress, and heavy metals stress by creating osmolytes and activating antioxidant enzymes, decreasing the LPO of the plasma membrane by connecting different proteins and lipids at the membrane surface (Jiang & Huang 2001). The same results were achieved by Bhardwaj *et al.* (2018); Jaleel *et al.* (2007a, 2007b) in the case of *Triticum aestivum* and *C. roseus*, respectively, applied with 10 mM  $CaCl_2$  solution under drought stress conditions.

In the current experimental work, an improvement in PRO content in *H. vulgare* L. seedling under an induced water stress condition in combination with  $CaCl_2$  solution was observed. Results showed that water-deficit stress increased PRO content, while  $CaCl_2$  (10 mM) solution further raised the levels of PRO content. Interactively,  $CaCl_2$  and varying drought stress periods significantly ( $P \leq 0.05$ ) enhanced the concentration of PRO content as compared to control, drought and the rest of the groups (Figure 6; Table 3).

PRO accumulation in the leaves is considered an important adaptation of plants to abiotic stress conditions (Dobra *et al.* 2011). PRO is well known for its osmoprotective property under stress regimes. In plants, an increased level of PRO during drought stress is believed to be an indicator of drought stress tolerance. PRO plays a key role in the mechanism of osmotic adjustment in many crops under severely stressed conditions. The amount of PRO is regulated by two important enzymes: proline oxidase (PROX) and  $\gamma$ -glutamyl kinase ( $\gamma$ -GK) (Ahmad *et al.* (2010)). Parallel to our results, similar findings were noted by Jaleel *et al.* (2007a, 2007b) who carried out studies on *C. roseus* exposed to  $CaCl_2$  solution under drought stress. Likewise PRO content, a significant ( $P \leq 0.05$ ) increase was noted in the levels of glycine betaine content under induced water-deficit stress conditions with  $CaCl_2$  application (Figure 7; Table 3).

GB is quaternary ammonium compound and acts as an osmotic solute. Glycophytes like oat, tomato, peas, beans, beets, and carrots showed an increase in GB with increasing salinity and drought (Girija *et al.* 2002). Osmotic adjustment is an important physiological event through which plants resist stress conditions. During abiotic stress accumulation of organic solutes such as PRO and GB in the cytoplasm helps in the osmotic adjustment of organic molecules. In resistance to drought, many species of plants accumulated higher content of organic solutes in their tissues (Khan *et al.* 2010a, 2010b, 2010c). The same results were found by Bhardwaj *et al.* (2018); Jaleel *et al.* (2007a, 2007b) in the case of *T. aestivum* and *C. roseus* exposed to 10 mM  $CaCl_2$  under drought stress regimes.

Varying levels of induced drought stress conditions in combination with  $CaCl_2$  (10 mM) application significantly ( $P \leq 0.05$ ) increased APX, CAT, SOD, and POD activities in *H. vulgare* L. The amount of all the above-mentioned enzymes increased with increasing duration of drought stress. In comparison with the control group the rest of the groups' higher enzymatic activities were observed in 10 and 15-days of drought stress regimes with 10 mM  $CaCl_2$  solution (Figures 8–11; Table 3). Under stress conditions, the accumulation of ROS and other free radicals cause corrosive effects on biological membranes and biomolecules. APX, POD, SOD, and other protective enzymes effectively scavenge ROS and other free radicals (Zhang *et al.* 2019). Plant cells have a complex enzymatic as well as a non-enzymatic antioxidant system to prevent cellular damage caused by ROS (Hasanuzzaman & Fujita 2011; Kumar *et al.* 2013), non-enzymatic components like carotenoids, glutathione and tocopherols, coupled with antioxidant enzymes, such as SOD, CAT, and glutathione peroxidase (GPX) scavenge ROS and other free radicals (Ahmad *et al.* 2015a, 2015b). ROS attack proteins, lipids and nucleic acids, and the degree of damage depends on the balance between ROS production and their removal by the antioxidative scavenging systems (Menezes-Benavente *et al.* 2004).

In the drought related studies, during the recovery process  $\text{CaCl}_2$  showed a significant effect on antioxidant enzymes. The ability of *Camellia sinensis* genotypes to enhance CAT activities during post-stress rehydration and  $\text{CaCl}_2$  treatment could improve the post-drought recovery process. As *C. sinensis* is a  $\text{C}_3$  plant, higher CAT activity could scavenge the  $\text{H}_2\text{O}_2$  formed in the photorespiratory pathway and thereby reduce photorespiration rate (Jeyaramraya *et al.* 2003). SOD activities were also increased in the tested *C. sinensis* cultivars along with consistently increasing activities of POX and GR (GR). Increased GR activity in stress plants improves stress tolerance and has the ability to alter the redox potential of the important component of the electron transport chain. Glutathione is maintained in a reduced state by GR, higher GR activity induced by  $\text{CaCl}_2$  in water stressed plants could be an adaptive advantage for resumption of growth after stress conditions (Asada & Takahashi 1987), but an increase in SOD activities after drought during the recovery period could be an adaptation to improve growth after drought stress regimes. Parallel to our findings, Upadhyaya *et al.* (2011) claimed consistent results, suggesting that  $\text{CaCl}_2$  solution improved the activities of antioxidant enzymes along with growth responses under drought stress conditions.

## 6. CONCLUSIONS

In conclusion, it has been evident that  $\text{CaCl}_2$  solution (10 mM) applied via roots effectively curbed the damaging effects of ROS and other free radicals formed during induced drought stress conditions; by regulating key physiological processes such as osmolyte accumulation which mainly include PRO, proteins, GB, and the activation of the antioxidant enzymatic system. In addition, the agriculture sector of Pakistan has been adversely affected by the continuous shifts in climatic conditions that might lead the country towards food insecurity by 2030. Besides, the ground water table of Peshawar has been reducing 1–3 feet annually. The present findings could be helpful for determining the ways in which conditions could be handled to secure the survival and enhance the growth of barley under water-limited conditions. Furthermore, there is still a great need for further research to assess various growth and physio-biochemical responses of barley cultivars to different types of growth regulators under abiotic stress conditions.

## ACKNOWLEDGEMENTS

We are highly obliged to the Department of Botany, University of Peshawar for providing all the facilities regarding the accomplishment of this work. Besides, the authors are thankful to the editors and reviewers for their valued comments and suggestions regarding this scientific study.

## DATA AVAILABILITY STATEMENT

All relevant data are included in the paper or its Supplementary Information.

## CONFLICT OF INTEREST

The authors declare there is no conflict.

## REFERENCES

- Abdelly, C., Bouchereau, A., Flowers, T. & Savoure, A. 2015 Diversity, distribution and roles of osmoprotective compounds accumulated in halophytes under abiotic stress. *Annals of Botany* **115**, 433–447.
- Ahmad, P., Jaleel, C. A. & Sharma, S. 2010 Antioxidant defense system, lipid peroxidation, proline-metabolizing enzymes, and biochemical activities in two *Morus alba* genotypes subjected to NaCl stress. *Russian Journal of Plant Physiology* **57** (4), 509–517.
- Ahmad, A., Ashfaq, M., Rasul, G., Wajid, S. A., 2015a Impact of climate change on the rice-wheat cropping system of Pakistan. In: *Handbook of Climate Change and Agrico-Ecosystems* (Rosenzweig, C. & Hillel, D., eds.). Imperial College Press, London, pp. 219–258
- Ahmad, P., Sarwat, M., Bhat, N. A., Wani, M., Kazi, A. G. & Tran, L. S. 2015b Alleviation of cadmium toxicity in *Brassica juncea* L. by calcium application involves various physiological and biochemical strategies. *PLoS One*. **10** (3), 114–571.
- Ahmad, N., Waqas, T., Shafique, M. & Ullah, I. 2022 The land surface temperature dynamics and Its impact on land cover in district Peshawar, Khyber Pakhtunkhwa. *International Journal of Environment and Geoinformatics* **9** (3), 97–107.
- Al-Ansari, F. & Ksiksi, T. A. 2018 Quantitative assessment of germination parameters: the case of *Capsicum annuum* L. *Jornal of Ecology* **11**, 13–21.
- Al-Hassan, M., Fuertes, M. M., Sánchez, F. J. R., Vicente, O. & Boscaiu, M. 2015 Effects of salt and water stress on plant growth and on accumulation of osmolytes and antioxidant compounds in cherry tomato. *Notulae Botanicae Horti Agrobotanici* **43** (1), 1–11.

- Ali, S., Li, D., Congbin, F. & Khan, F. 2015 Twenty first century climatic and hydrological changes over Upper Indus Basin of Himalayan region of Pakistan. *Environmental Research Letters* **10** (1), 014007.
- Ali, S. M., Khalid, B., Akhter, A., Islam, A. & Adnan, S. 2020 Analyzing the occurrence of floods and droughts in connection with climate change in Punjab province, Pakistan. *Natural Hazards* **103** (2), 2533–2559.
- Asada, K. & Takahashi, M. 1987 Production and scavenging of active oxygen in photosynthesis. *Photoinhibition* **9**, 227–287.
- Avramova, V., Abdelgawad, H., Zhang, Z., Fotschki, B., Casadevall, R., Vergauwen, L., Knapen, D., Taleisnik, E., Guisez, Y., Asard, H. & Beemster, G. T. 2015 Drought induces distinct growth response, protection and recovery mechanisms in the maize leaf growth zone. *Plant Physiology* **2**, 1382–1396.
- Ayad, H. S., El-Din, K. G. & Reda, F. 2009 Efficiency of stigmasterol and acute $\alpha$ -tocopherol application on vegetative growth, essential oil pattern, protein and lipid peroxidation of geranium (*Pelargonium graveolens* L.). *Journal of Applied Science Research* **1**, 887–892.
- Bandara, J. S. & Cai, Y. 2014 The impact of climate change on food crop productivity, food prices and food security in South Asia. *Economic Analysis and Policy* **44**, 451–465.
- Barriga, B. & Anj, P. F. 2000 Relationships between yield, yield components and morphological characters above the flag node in spring wheat. *Field Crop Abstracts* **31**, 20.
- Barta, C., Dunkle, A. M., Wachter, R. M. & Salvucci, M. E. 2010 Structural changes associated with the acute thermal instability of Rubisco activase. *Archives of Biochemistry and Biophysics* **499** (1–2), 17–25.
- Bhardwaj, K., Singh, P., Raina, M., Sharma, V. & Kumar, D. 2018 Exogenous application of calcium chloride in wheat genotypes alleviates negative effect of drought stress by modulating antioxidant machinery and enhanced osmolyte accumulation. *In Vitro Cellular & Developmental Biology* **54** (5), 495–507.
- Biemans, H., Speelman, L. H., Ludwig, F. & Moors, E. J. 2013 Future water resources for food production in five south Asian river basins and potential for adaptation – A modeling study. *Science of the Total Environment* **468–469**, S117–S131.
- Chaudhary, Q. Z. 2017 *Climate Change Profile of Pakistan*. Asian Development Bank, Metro Manila, Philippines.
- Colorado, P., Rodriguez, A., Nicolas, G. & Rodriguez, D. 1994 Abscisic acid and stress regulate gene expression during germination of chick pea seeds, possible role of calcium. *Physiologia Plantarum* **91**, 461–467. doi:10.1111/j.1399-3054.1994.tb02975.
- Cousson, A. 2009 Involvement of phospholipase C-independent calcium-mediated abscisic acid signaling during Arabidopsis response to drought. *Biologia Plantarum* **53**, 53–62. doi:10.1007/s10535-009-0008-0.
- Dawood, M. G. 2016 Influence of osmoregulators on plant tolerance to water stress. *Agric- Science* **13** (1), 42–58.
- Di-Martino, C., Delfino, S., Pizzuto, R., Loreto, F. & Fuggi, A. 2003 Free amino acids and glycine betaine in leaf osmoregulation of spinach responding to increasing salt stress. *New Phytologist* **158** (3), 455–463.
- Dobra, J., Vanková, R., Havlová, M., Burman, A. J. & Libus, J. 2011 Tobacco leaves and roots differ in the expression of proline metabolism-related genes in the course of drought stress and subsequent recovery. *Journal of Plant Physiology* **168**, 1588–1597. doi:10.1016/j.jplph.2011.02.009. PubMed: 21481968.
- Farooq, M., Wahid, A., Kobayashi, N., Fujita, D. & Basra, S. M. A. 2009 Plant drought stress: effects, mechanisms and management. *Agronomy for Sustainable Development* **29**, 185–212.
- Gee, G. W. & Bauder, J. W. 1979 Particle size analysis by hydrometer: a simplified method for routine textural analysis and a sensitivity test of measurement parameters. *Soil Science Society of America Journal* **43** (5), 1004–1007.
- Ghulam, A., Shakeel, A., Ashfaq, A., Wajid, N., Zartash, F., Sajjad, H., Muhammad, H. U. R., Muhammad, A. K., Mirza, H., Fahad, S., Kenneth, J. B. & Gerrit, H. 2017 Quantification the impacts of climate change and crop management on phenology of maize-based cropping system in Punjab, Pakistan. *Agriculture Meteorology* **247**, 42–55.
- Ghule, P. L., Dahiphale, V. V., Jadhav, J. D. & Palve, D. K. 2013 Absolute growth rate, relative growth rate, net assimilation rate as influenced on dry matter weight of Bt cotton. *International Journal of Research in Agricultural Science* **4**, 42–46.
- Girija, C., Smith, B. N. & Swamy, P. M. 2002 Interactive effects of sodium chloride and calcium chloride on the accumulation of proline and glycinebetaine in peanut (*Arachis hypogaea* L.). *Environmental and Experimental Botany* **47** (1), 1–10.
- Gobinathan, P., Affaq, M., Murali, P. V., Somasundaram, R. & Panneerselvam, R. 2011 Interactive effects of sodium chloride and calcium chloride on biochemical constituents and proline metabolism of *Pennisetum glaucum* (L.) R. *British Journal of Pharmaceutical Research* **4** (8), 2842–2845.
- Hanway, J. J. & Heidel, H. 1952 Soil analysis methods as used in Iowa State college soil testing laboratory. *Iowa Agriculture* **54**, 1–31.
- Hasanuzzaman, M. & Fujita, M. 2011 Selenium pretreatment upregulates the antioxidant defense and methylglyoxal detoxification system and confers enhanced tolerance to drought stress in rapeseed seedlings. *Biological Trace Element Research* **143**, 1758–1776.
- Hayat, S., Hayat, Q., Alyemeni, M. N., Wani, A. S., Pichtel, J. & Ahmad, A. 2012 Role of proline under changing environments: a review. *Plant Signal Behaviour* **7**, 1456–1466.
- Hernandez, J. A. & Almansa, M. S. 2002 Short-term effects of salt stress on antioxidant systems and leaf water relations of pea plants. *Physiologia Plantarum* **115**, 251–257.
- Hussain, S. S. & Mudasser, M. 2007 Prospects for wheat production under changing climate in mountain areas of Pakistan—an econometric analysis. *Agricultural Systems* **94** (2), 494–501.
- Idrees, M., Shahzad, N. & Afzal, F. 2022 Growing Climate Change Impacts on Hydrological Drought and Food Security in District Peshawar, Pakistan. In: *Handbook of Climate Change Across the Food Supply Chain* (Leal Filho, W., Djekic, I., Smetana, S., Kovaleva, M., eds.) Springer, Cham, pp. 467–483.



- International Union for Conservation of Nature (IUCN) 2009 *Climate Change: Vulnerabilities in Agriculture in Pakistan*. International Union for Conservation of Nature, Karachi, Pakistan.
- Jackson, M., Miller, R. & Forkiln, R. 1973 *Soil Chemical Analysis*, 2nd eds. Prentic-Hall of India Pvt. & Ltd, New Delhi.
- Jaleel, C. A., Manivannan, P., Kishorekumar, A., Sankar, B., Gopi, R., Somasundaram, R. & Panneerselva, R. 2007a *Alterations in osmoregulation, antioxidant enzymes and indole alkaloid levels in Catharanthus roseus exposed to water deficit*. *Colloids and Surfaces* **59** (2), 150–157.
- Jaleel, C. A., Manivannan, P., Sankar, B., Kishorekumar, A., Gopi, R., Somasundaram, R. & Panneerselvam, R. 2007b *Water deficit stress mitigation by calcium chloride in Catharanthus roseus: effects on oxidative stress, proline metabolism and indole alkaloid accumulation*. *Colloids and Surfaces* **60** (1), 110–116.
- Jeyaramaya, P. R., Roy, R. K., Pius, P. K. & Thomas, J. 2003 *Photo assimilatory and photo respiratory behaviour of certain drought tolerant and susceptible tea genotypes*. *Photosynthetica* **41** (4), 579–558.
- Jiang, Y. & Huang, B. 2001 *Effects of calcium on antioxidant activities and water relations associated with heat tolerance in two cool-season grasses*. *Journal of Experimental Botany* **52** (355), 341–349.
- Kader, M. A. 2005 *A comparison of seed germination calculation formulae and the associated interpretation of resulting data*. *Royal Society New South Wales* **138**, 65–75.
- Keeney, D. R. & Nelson, D. W. 1982 *Nitrogen – inorganic forms 1. Methods of soil analysis. Part 2. Chemical and Microbiological properties* **2**, 643–698.
- Khan, A. & Ali, M. 2019 *Impact of built environment on groundwater depletion in Peshawar, Pakistan*. *Journal of Himalayan Earth Sciences* **52** (1), 86.
- Khan, N. I. & Bajwa, M. A. 2010 *Evaluation of potentialities of spring wheat parents and crosses for important agronomical and pathological traits*. *Pakistan Journal of Agricultural Sciences* **2**, 133–137.
- Khan, H. R., Paull, J. G., Siddique, K. H. M. & Stoddard, F. L. 2010a *Faba bean breeding for drought-affected environments: a physiological and agronomic perspective*. *Field Crop Research* **11** (5), 279–286.
- Khan, M. A., Asaf, S., Khan, A. L., Jan, R., Kang, S. M. & Kim, K. M. 2010b *Thermotolerance effect of plant growth-promoting Bacillus cereus SA1 on soybean during heat stress*. *BMC Microbiology* **20**, 175.
- Khan, M. N., Siddiqui, M. H., Mohammad, F., Naeem, M. & Khan, M. M. A. 2010c *Calcium chloride and gibberellic acid protect linseed (Linum usitatissimum L.) from NaCl stress by inducing antioxidative defence system and osmo-protectant accumulation*. *Acta Physiologiae Plantarum* **32** (1), 121–132.
- Khuram, I., Ahmad, N. & Barinova, S. 2021 *Effect of water quality on the spatial distribution of charophytes in the Peshawar Valley, Khyber Pakhtunkhwa, Pakistan*. *Oceanological and Hydrobiological Studies* **50** (4), 359–372.
- Kramer, P. J. 1983 *Plant Water Relations*. Academic Press, New York.
- Kumar, D., Yusuf, M. A., Singh, P., Sardar, M. & Sarin, N. B. 2013 *Modulation of antioxidant machinery in  $\alpha$ -tocopherol enriched transgenic Brassica juncea plants tolerant to abiotic stress condition*. *Proto Plasma* **250**, 1079–1089.
- Lal, R. 2013 *Food security in a changing climate*. *Ecohydrology & Hydrobiology* **13**, 8–21.
- Latef, A. A. H. 2011 *Ameliorative effect of calcium chloride on growth, antioxidant enzymes, protein patterns and some metabolic activities of canola (Brassica napus L.) under seawater stress*. *Journal of Plant Nutrition* **34** (9), 1303–1320.
- Manivannan, P., Jaleel, C. A., Sankar, B., Kishorekumar, A., Somasundaram, R., Lakshmanan, G. A. & Panneerselvam, R. 2007 *Growth, biochemical modifications and proline metabolism in Helianthus annuus L. as induced by drought stress*. *Colloids and Surfaces* **59** (2), 141–149.
- McClean, E. O., 1982 *Soil pH and lime requirement methods of soil analysis, Part 2*. In: *Chemical and Microbiological Properties – Agronomy Monograph no. 9*, 2nd edn (McClean, E. O., ed.). American Society of Agronomy and Soil Sciences Society of America, Madison, Wisconsin, pp. 199–225.
- Mehmood, R., Mehmood, S. A., Butt, M. A., Younas, I. & Adrees, M. 2016 *Spatiotemporal analysis of urban sprawl and its contributions to climate and environment of Peshawar using remote sensing and GIS techniques*. *Journal of Geographic Information System* **8** (2), 137–148.
- Mekki, B. E. D., Hussien, H. A. & Salem, H. 2015 *Role of glutathione, ascorbic acid and  $\alpha$ -tocopherol in alleviation of drought stress in cotton plants*. *International Journal of ChemTech Research* **8**, 1573–1581.
- Menezes-Benavente, L. S. P., Kernodle, M., Margis, P. & Scandalios, J. G. 2004 *Salt induced antioxidant metabolism defenses in maize (Zea mays L.) seedlings*. *Redox Report* **9**, 29–36.
- Mirzaee, M., Moieni, A. & Ghanati, F. 2013 *Effects of drought stress on the lipid peroxidation and antioxidant enzyme activities in two canola (Brassica napus L.) cultivars*. *Journal of Agricultural Science and Technology* **15** (3), 593–602.
- Nelson, D. W. & Sommers, L. 1982 *Total carbon, organic carbon, and organic matter 1. Methods of soil analysis. Part 2. Chemical and Microbiological properties* **9**, 539–579.
- Nicol, J. F., Raja, I. A., Allaudin, A. & Jamy, G. N. 1999 *Climatic variations in comfortable temperatures: the Pakistan projects*. *Energy and Buildings* **30** (3), 261–279.
- Passioura, J. B. 1982 *The role of root system characteristics in the drought resistance of crop plants*. In: *Special International Symposium on Principles and Methods of Crop Improvement for Drought Resistance: With Emphasis on Rice*, College, Laguna (Philippines). IRRI, Loss Banos, Philippines, pp. 71–82.

- Perveen, S., Samad, A. B., Nazif, W. & Shah, S. 2012 Impact of sewage water on vegetables quality with respect to heavy metals in Peshawar, Pakistan. *Pakistan Journal of Botany* **44** (6), 1923–1931.
- Rane, J., Maheshwari, M. & Nagarajan, V. 2001 Effect of pre-anthesis water stress on growth, photosynthesis and yield of six wheat cultivars differing in drought tolerance. *Indian Journal of Plant Physiology* **6**, 53–60.
- Rasouli, F., Kiani-Pouya, A., Tahir, A., Shabala, L., Chen, Z. & Shabala, S. 2021 A comparative analysis of stomatal traits and photosynthetic responses in closely related halophytic and glycophytic species under saline conditions. *Environmental and Experimental Botany* **181**, 104300.
- Saeed, F. & Athar, H. 2018 Assessment of simulated and projected climate change in Pakistan using IPCC AR4-based AOGCMs. *Theoretical and Applied Climatology* **134**, 967–980. <https://doi.org/10.1007/s00704-017-2320-5>.
- Salimi, F., Shekari, F. & Hamzei, J. 2016 Methyl jasmonate improves salinity resistance in German chamomile (*Matricaria chamomilla* L.) by increasing activity of antioxidant enzymes. *Acta Physiologiae Plantarum* **38**, 1–14.
- Salma, S., Rehman, S. & Shah, M. A. 2012 Rainfall trends in different climate zones of Pakistan. *Pakistan Journal of Meteorology* **9** (17), 37–47.
- Sardoei, A. S. & Mohammadi, G. A. 2014 Study of salinity effect on germination of tomato (*Lycopersicon esculentum* L.) genotypes. *European Journal of Experimental Biology* **4**, 283–287.
- Semida, W. M., Taha, R. S., Abdelhamid, M. T. & Rady, M. M. 2014 Foliar applied  $\alpha$ -tocopherol enhances salt-tolerance in *Vicia faba* L. plants grown under saline conditions. *South African Journal of Botany* **95**, 24–31.
- Sestak, Z., Catsky, J. & Jarris, P. G. 1971 *Plant Photosynthetic Production: Manual of Methods*. W. Junk Publishing Co, The Hague, pp. 1–48.
- Sewelam, N., Dowidar, S., Abo-Kassem, E. A. & Sobhy, S. 2017 Study of the interactive effects of calcium and abscisic acid on drought stressed *Triticum aestivum* Seedlings. *Egyptian Journal of Botany* **57**, 215–232.
- Shafique, M., Israr, S., Shah, M. T. & Khan, M. A. 2014 Remote sensing based strategy of stream sediment sampling for mineral exploration in Peshawar Basin, Khyber Pakhtunkhwa, Pakistan. *Journal of Himalayan Earth Sciences* **47** (2), 141.
- Shah, W., Ullah, S., Ali, S., Idrees, M., Khan, M. N., Ali, K. & Younas, F. 2021 Effect of exogenous alpha-tocopherol on physio-biochemical attributes and agronomic performance of lentil (*Lens culinaris Medik.*) under drought stress. *PloS one* **16** (8), e0248200.
- Shakoor, U., Saboor, A. & Baig, I. 2015 Climate variability impacts on rice crop production in Pakistan. *Pak Journal of Agricultural Research* **28**, 19–27.
- Shao, H. B., Chu, L. Y., Jaleel, C. A. & Zhao, C. X. 2008 Water-deficit stress-induced anatomical changes in higher plants. *Comptes Rendus Biologies* **331** (3), 215–225.
- Slama, I., Abdelly, C., Bouchereau, A., Flowers, T. & Savoure, A. 2015 Diversity, distribution and roles of osmoprotective compounds accumulated in halophytes under abiotic stress. *Ann. Bot* **115** (3), 433–447.
- Sundaravalli, K. & Paliwal, A. 2005 Ruckmani, effect of water stress on photosynthesis, protein content and nitrate reductase activity of *Albizzia* seedlings. *Journal of Plant Biology* **32**, 13–17.
- Tian, L., Bi, W., Liu, X., Sun, L. & Li, J. 2019 Effects of waterlogging stress on the physiological response and grain-filling characteristics of spring maize (*Zea mays* L.) under field conditions. *Acta Physiologica Plantarum* **41** (5), 41–63.
- Upadhyaya, H., Panda, S. K. & Dutta, B. K. 2011  $\text{CaCl}_2$  improves post-drought recovery potential in *Camellia sinensis* (L.). *Plant Cell Reports* **30** (4), 495–503.
- Velikova, V., Yordanov, I. & Edreva, A. 2000 Oxidative stress and some antioxidant systems in acid rain-treated bean plants: protective role of exogenous polyamines. *Plant Sciences* **151** (1), 59–66.
- Wahid, A., Gelani, S., Ashraf, M. & Foolad, M. R. 2007 Heat tolerance in plants: an overview. *Environmental and Experimental Botany* **61**, 199–223.
- Wang, Y., Yang, Z., Zhang, Q. F. & Li, J. L. 2009 Enhanced chilling tolerance in *Zoysia matrella* by pre-treatment with salicylic acid, calcium chloride, hydrogen peroxide or 6-benzylaminopurine. *Plant Biology* **53** (1), 179.
- World Bank 2018 Available from: <https://data.worldbank.org/indicator/SP.POP.GROW>.
- Xu, C., Li, X. & Zhang, L. 2013 The effect of calcium chloride on growth, photosynthesis, and antioxidant responses of *Zoysia japonica* under drought conditions. *PLoS ONE* **8** (7), e68214. doi:10.1371/journal.pone.0068214.
- Yadav, S. K., Jyothi-Lakshmi, N., Maheswari, M., Vanaja, M. & Venkateswarlu, B. 2005 Influence of water deficit at vegetative, anthesis and grain filling stages on water relation and grain yield in sorghum. *Indian Journal of Plant Physiology* **10**, 20–24.
- Yang, F. & Miao, L. F. 2010 Adaptive responses to progressive drought stress in two poplar species originating from different altitudes. *Silva Fennica* **44** (1), 23–37.
- Yin, C., Wang, X., Duan, B., Luo, J. & Li, C. 2005 Early growth, dry matter allocation and water use efficiency of two sympatric populus species as affected by water stress. *Environmental and Experimental Botany* **53**, 315–322.
- Zaheer, M. S., Raza, M. A. S., Saleem, M. F., Khan, I. H., Ahmad, S. & Iqbal, R. 2019 Investigating the effect of *Azospirillum brasilense* and *Rhizobium pisi* on agronomic traits of wheat (*Triticum aestivum* L.). *Archives of Agronomy and Soil Science* **65**, 1554–1564.
- Zhang, X. Y., Fang, Z. W., Liu, H. N., Zhao, D. Q. & Tao, J. 2019 Exogenous calcium-induced physiological and biochemical changes in tree peony (*Paeonia section Moutan* DC.) under drought stress. *Photosynthetica* **57** (4), 904–911.
